1        **Persistent autism-relevant phenotype produced by *in utero* and lactational exposure of**  
2                                **female mice to the commercial PBDE mixture, DE-71**

3  
4 Elena V. Kozlova<sup>1,2</sup>, Matthew C. Valdez<sup>1,2,8</sup>, Maximillian E. Denys<sup>1</sup>, Anthony E. Bishay<sup>1</sup>, Julia  
5 M. Krum<sup>1</sup>, Kayhon M. Rabbani<sup>1</sup>, Valeria Carrillo<sup>1</sup>, Gwendolyn M. Gonzalez<sup>1</sup>, Gregory Lampel<sup>1</sup>,  
6 Jasmin D. Tran<sup>1</sup>, Brigitte M. Vazquez<sup>1</sup>, Laura M. Anchondo<sup>1</sup>, Syed A. Uddin<sup>1</sup>, Nicole M.  
7 Huffman<sup>1</sup>, Eduardo Monarrez<sup>1</sup>, Duraan S. Olomi<sup>1</sup>, Bhuvaneswari D. Chinthirla<sup>1</sup>, Richard E.  
8 Hartman<sup>4</sup>, Prasada S. Rao Kodavanti<sup>8</sup>, Gladys Chompre<sup>5</sup>, Allison L. Phillips<sup>3</sup>, Heather M.  
9 Stapleton<sup>3</sup>, Bernhard Henkelmann<sup>6</sup>, Karl-Werner Schramm<sup>6,7</sup>, and Margarita C. Curras-Collazo<sup>1\*</sup>

10

11 Orchid IDs: E.V.K.: 0000-0002-4691-6618; A.E.B.: 0000-0002-6057-3770; K.W.S.: 0000-0002-  
12 8945-4062; M.C.C.: 0000-0002-0189-4179

13

14 <sup>1</sup>Department of Molecular, Cell and Systems Biology, University of California, Riverside, CA  
15 92521, USA

16 <sup>2</sup>Neuroscience Graduate Program, University of California, Riverside, CA, 92521, USA

17 <sup>3</sup>Duke University, Nicholas School of the Environment, Durham, NC 27710, USA

18 <sup>4</sup>Department of Psychology, Loma Linda University, Loma Linda CA 92350, USA

19 <sup>5</sup>Biotechnology Department, Pontifical Catholic University of Puerto Rico, Ponce, Puerto Rico  
20 00717-9997 USA.

21 <sup>6</sup>Helmholtz Zentrum Munchen, German National Research Centre for Environmental Health  
22 (GmbH), Molecular EXposomics (MEX), Ingolstaedter Landstrasse 1, Neuherberg, Munich,  
23 Germany

24 <sup>7</sup>TUM, Wissenschaftszentrum Weihenstephan für Ernährung, Landnutzung und Umwelt,  
25 Department für Biowissenschaftliche Grundlagen, Weihenstephaner Steig 23, 85350 Freising,  
26 Germany  
27 <sup>8</sup>Neurological and Endocrine Toxicology Branch, Public Health and Integrated Toxicology  
28 Division, CPHEA/ORD, U.S. Environmental Protection Agency, Research Triangle Park, NC  
29 27711 USA

30 **\*Corresponding author:**

31 Dr. Margarita C. Curras-Collazo, Ph.D  
32 Professor of Neuroscience  
33 Department Molecular, Cell and Systems Biology  
34 University of California, Riverside  
35 Riverside, CA 92521  
36 951-827-3960  
37 [mcur@ucr.edu](mailto:mcur@ucr.edu)

38

39 **Declarations**

40

41 **Funding**

42 We acknowledge funding from UCR Committee on Research (CoR) Grants to M.C.C.; UC  
43 MEXUS Awards to M.C.C., E.V.K., M.C.V.; NSF GRFP to M.C.V.; MARC U STAR Fellowship  
44 and NIH T34 (T34GM062756) to G.M.G.; UCR GRMP to E.V.K.; Sigma Xi Grant-in-Aid of  
45 Research award to E.V.K., K.M.R., M.E.D.; UCR Undergraduate Minigrant to E.V.K., K.M.R.,  
46 A.E.B., V.C., G.L., B.M.V.; STEM-HSI Department of Education Award to E.V.K.; UCR



47 Chancellor's Fellowship to J.M.K., APS IOSP Scholarship to L.M.A, APS STRIDE to A.E.B.,  
48 and NIH R01 ES016099 to H.M.S.

#### 49 **Conflicts of interests/Competing interests**

50 The authors report no conflicts of interests and have no competing interests to declare.

51 **Disclaimer:** J.M.K. is now a 2nd Lieutenant at the Uniformed Services University, Department of  
52 Defense. Her work was performed at the University of California, Riverside before becoming a  
53 military officer. However, we want to emphasize that the opinions and assertions expressed herein  
54 are those of the authors and do not necessarily reflect the official policy or position of the  
55 Uniformed Services University or the Department of Defense.

56 The research described in this article has been reviewed by the Center for Public Health and  
57 Environmental Assessment, U.S. Environmental Protection Agency (EPA) and approved for  
58 publication. Approval does not signify that the contents necessarily reflect the views and policies  
59 of the agency nor does the mention of trade names of commercial products constitute endorsement  
60 or recommendation for use.

61

#### 62 **Availability of Data and Material**

63 Not applicable.

#### 64 **Code Availability**

65 Not applicable.

66

#### 67 **CRedit authorship contribution statement**

68 **Elena V. Kozlova:** Conceptualization, Data curation, Formal Analysis, Funding acquisition,  
69 Investigation, Methodology, Project administration, Software, Supervision, Validation,

70 Visualization, Writing – original draft, Writing – review & editing. **Matthew C. Valdez:**  
71 Conceptualization, Data curation, Formal Analysis, Funding acquisition, Investigation,  
72 Methodology, Project administration, Software, Supervision, Validation. **Maximilian E. Denys:**  
73 Formal Analysis, Funding Acquisition Investigation, Software, Writing – original draft. **Anthony**  
74 **E. Bishay:** Formal Analysis, Funding Acquisition, Investigation, Writing – original draft. **Julia**  
75 **M. Krum:** Data curation, Funding Acquisition, Investigation, Methodology, Software,  
76 Visualization. **Kayhon M. Rabbani:** Formal Analysis, Funding Acquisition, Investigation,  
77 Software, Validation, Data curation. **Valeria Carrillo:** Investigation, Funding Acquisition, Data  
78 curation. **Gwen M. Gonzalez:** Funding acquisition, Investigation, Methodology, Validation.  
79 **Jasmin D. Tran:** Formal Analysis, Investigation, Funding acquisition. **Brigitte M. Vazquez:**  
80 Investigation, Funding Acquisition. **Gregory Lampel:** Investigation, Funding Acquisition. **Laura**  
81 **M. Anchondo:** Investigation, Software. **Syed A. Uddin:** Investigation, Software, Validation.  
82 **Nicole M. Huffman:** Investigation, Software, Validation. **Eduardo Monarrez:** Investigation,  
83 Data curation, Software, Validation. **Duraan S. Olomi:** Investigation, Data curation.  
84 **Bhuaneswari D. Chinthirla:** Investigation. **Richard E. Hartman:** Resources, Software,  
85 Methodology, Validation, Writing – review & editing. **Prasada Rao S. Kodavanti:** Funding  
86 acquisition, Resources, Writing – review & editing. **Gladys Chompre:** Investigation. **Allison L.**  
87 **Phillips:** Formal Analysis, Investigation, Writing – review & editing. **Heather M. Stapleton:**  
88 Formal Analysis, Funding acquisition, Methodology, Resources, Supervision, Validation, Writing  
89 – review & editing. **Bernhard Henkelmann:** Investigation, Methodology, Validation, Writing -  
90 original draft. **Karl-Werner Schramm:** Methodology, Resources, Funding acquisition,  
91 Supervision, Writing – review & editing. **Margarita C. Curras-Collazo:** Conceptualization,

92 Formal Analysis, Funding acquisition, Methodology, Project administration, Resources,  
93 Supervision, Validation, Visualization, Writing – original draft, Writing – review & editing

94 **Ethics approval**

95 Care and treatment of animals was performed in accordance with guidelines from and approved  
96 by the University of California, Riverside Institutional Animal Care and Use Committee (AUP  
97 #00170026 and 20200018).

98 **Consent to participate**

99 Not applicable.

100 **Consent for publication**

101 All authors reviewed and approved the final manuscript.

102

103

104

105

106

107

108

109

110

111

112

113

114

115 **Abstract**

116

117 Polybrominated diphenyl ethers (PBDEs) are ubiquitous persistent organic pollutants (POPs) that  
118 are known neuroendocrine disrupting chemicals with adverse neurodevelopmental effects. PBDEs  
119 may act as risk factors for autism spectrum disorders (ASD), characterized by abnormal  
120 psychosocial functioning, although direct evidence is currently lacking. Using a translational  
121 exposure model, we tested the hypothesis that maternal transfer of a commercial mixture of  
122 PBDEs, DE-71, produces ASD-relevant behavioral and neurochemical deficits in female  
123 offspring. C57Bl6/N mouse dams (F0) were exposed to DE-71 via oral administration of 0  
124 (VEH/CON), 0.1 (L-DE-71) or 0.4 (H-DE-71) mg/kg bw/d from 3 wk prior to gestation through  
125 lactation. Mass spectrometry analysis indicated *in utero* and lactational transfer of PBDEs (ppb)  
126 to F1 female offspring brain tissue at postnatal day (PND) 15 which was reduced by PND 110.  
127 Neurobehavioral testing of social novelty preference (SNP) and social recognition memory (SRM)  
128 revealed that adult L-DE-71 F1 offspring display altered short- and long-term SRM, in the absence  
129 of reduced sociability, and increased repetitive behavior. These effects were concomitant with  
130 reduced olfactory discrimination of social odors. Additionally, L-DE-71 exposure also altered  
131 short-term novel object recognition memory but not anxiety or depressive-like behavior.  
132 Moreover, F1 L-DE-71 displayed downregulated mRNA transcripts for oxytocin (*Oxt*) in the bed  
133 nucleus of the stria terminalis (BNST) and supraoptic nucleus, vasopressin (*Avp*) in the BNST and  
134 upregulated *Avp1ar* in BNST, and *Oxtr* in the paraventricular nucleus. Our work demonstrates that  
135 developmental PBDE exposure produces ASD-relevant neurochemical, olfactory processing and  
136 behavioral phenotypes that may result from early neurodevelopmental reprogramming within  
137 central social and memory networks.

138

139 **Short Title**

140 Developmental PBDEs produce an autism-relevant phenotype

141

142 **Keywords**

143 organohalogenes, endocrine-disrupting chemicals, developmental exposure, maternal transfer,

144 autism

145

146

147

148

149

150

151

152

153

154

155

156

157

158

159

160

## 161 **Introduction**

162

163 Autism spectrum disorder (ASD) is a group of neurodevelopmental conditions defined  
164 clinically by deficits in social reciprocity and communication, restricted interest and repetitive  
165 behaviors (American Psychiatric Association, DSM-V, 2013). Hallmarks of ASD, as classified by  
166 the NIH Research Domain Criteria (RDoC)<sup>1</sup> include disturbances in the social cognition (SC)  
167 domain such as facial recognition ability, empathy and evaluating emotion of others<sup>2,3</sup>. The  
168 prevalence of ASD has increased dramatically over the past three decades. In the United States,  
169 the Centers for Disease Control (CDC) estimates that ASD affects 1 in 54 neurotypical children<sup>4</sup>,  
170 while the worldwide prevalence is estimated to be 1-2%<sup>5</sup>. While genetic heritability is an important  
171 factor in ASD etiology, the incremental incidence of autism over the last several decades, raises  
172 the possibility that environmental factors, such as xenobiotic chemicals, may contribute alongside  
173 genetic predisposition and to influence ASD risk<sup>6,7</sup>. Although the incidence of autism is 4 times  
174 more greater in boys, girls and women with autism are often undiagnosed, misdiagnosed or receive  
175 a diagnosis of autism at later age<sup>8</sup> suggesting underestimation in females. According to the female  
176 protective model, females may benefit from a higher threshold of genetic liability to manifest ASD  
177 phenotype<sup>9,10</sup> but may be more susceptible to xenobiotic chemicals<sup>11</sup> that can potentially influence  
178 risk of neurodevelopmental disorders (NDDs). Indeed, we have found that female mice offspring  
179 exposed to PBDEs during prenatal and postnatal development exhibit endocrine and metabolic  
180 disruption, indicating that females may provide a more susceptible substrate for studying  
181 xenobiotic effects on neurodevelopment<sup>12</sup>.

182 Polybrominated diphenyl ethers (PBDEs) are a class of brominated flame retardants added  
183 to a wide range of products including consumer building material, electronics, textiles, plastics

184 and foams including infant products<sup>13</sup> since the 1970s<sup>14</sup>. Three commercial formulations of PBDEs  
185 were prevalent in commerce, including penta-BDE, octa-BDE and deca-BDE. Two commercial  
186 PBDE mixtures, penta- and octa-BDEs, were banned in Europe in 2003 and all PBDEs were  
187 voluntarily phased out in the US by 2013, leading to a slow, but measurable, decrease in  
188 environmental levels as well as in human sera and breastmilk concentrations of some PBDE  
189 congeners<sup>15,16,15</sup>. Notwithstanding a commitment to voluntary phase out of deca-BDE by 2013,  
190 PBDE contamination is predicted to remain an ongoing problem through the next several decades  
191 due to their long half-lives, persistence in e-waste<sup>17</sup>, recycling into consumer products and  
192 inadvertent reappearance into environment<sup>18</sup>. In an unprecedented action, the U.S. EPA formally  
193 banned the production, import and distribution of deca-BDE in February 2021. Nevertheless,  
194 PBDEs are still being detected in various tissue samples worldwide, including human  
195 breastmilk<sup>19,20,21,22,23</sup>.

196 Compared to adults, infants and toddlers are at greater risk of the adverse health effects  
197 resulting from PBDE exposure since they disproportionately accumulate 3-to-9-fold greater body  
198 burdens<sup>24</sup>. Circulating levels of PBDEs in US children are 10-to-1000-fold higher than similar age  
199 populations in Mexico and Europe<sup>25</sup>. Elevated exposures in infants are due to the maternal transfer  
200 of PBDEs via cord blood and breastmilk<sup>26</sup>. After weaning in early childhood, an additional route  
201 of exposure is dust ingestion and inhalation associated with children's mouthing and crawling  
202 behaviors<sup>27,28</sup>. Therefore, high PBDE exposure poses significant health risks during critical periods  
203 of development.

204 Major health effects associated with PBDE exposures are endocrine disruption,  
205 reproductive and developmental toxicity and neurotoxicity<sup>29,30,31,32,33</sup>. Epidemiological studies  
206 examining an association between PBDE exposure and ASD show inconsistent findings. PBDE

207 exposure (e.g., BDE-153 and -47) during both pre- and post-natal development has been linked  
208 to adverse neurological outcomes such as impairments in executive function, poor attention and  
209 behavioral regulation, reduced social scores, and lower IQ. Early-life exposure to PBDEs (BDE-  
210 47, -99 and/or -100) has been associated with externalizing behaviors such as hyperactivity and  
211 impulsivity<sup>34,35,36,37,38</sup>. With regard to the association of PBDEs with social behavior deficits and  
212 ASD, preschool-aged children with greater  $\Sigma$ PBDE exposures were rated as less assertive by their  
213 teachers<sup>39</sup> or showed greater anxious behavior<sup>40</sup>. In the HOME prospective cohort study, PBDEs  
214 were associated with greater (BDE-28) or fewer (BDE-85) autistic behaviors<sup>41</sup>. Similarly,  
215 significantly higher risk of poor social competence symptoms was shown as a consequence of  
216 postnatal BDE-47 exposure<sup>42</sup>. Although the possibility that environmental toxicants serve as risk  
217 factors for social neurodevelopmental disorders (NDDs) has not been established<sup>43</sup>, PBDEs may  
218 have deleterious effects on children's social development relevant to ASD<sup>41-43,35,44</sup>. Studies in  
219 experimental animals demonstrate that certain PBDE congeners produce adverse effects on  
220 behavior, learning, and memory in exposed offspring<sup>29,31,45</sup> but information about the negative  
221 impact of PBDEs on psycho-social behavior is limited<sup>46,47</sup>. We hypothesized that developmental  
222 PBDE exposure produces ASD-relevant behavioral and neurochemical phenotypes in a mouse  
223 toxicant model.

224 Social recognition, or the ability to distinguish between familiar and novel conspecifics, is  
225 a fundamental process across species required for forming long-term attachments, hierarchies, and  
226 other complex social strategies that enhances survival<sup>48</sup>. Disturbances in this capacity are present  
227 in individuals with ASD who have difficulties identifying faces of novel conspecifics from those  
228 previously encountered<sup>2,3</sup>. Rodents, because of their highly social nature, are used as proxies for  
229 studying autism-relevant social competence<sup>49</sup>. Mouse social behavior paradigms rely on the



230 natural propensity for investigation of social novelty compared to previously encountered  
231 individuals when given the choice<sup>50</sup>. This preference for social novelty has been shown to be absent  
232 in mono-genetic, idiopathic and environmental models of ASD<sup>51,52,53</sup>. In the current study, we used  
233 a toxicant exposure mouse model to characterize social recognition ability, repetitive behaviors  
234 and concomitant autism comorbidities such as anxiety, memory impairment and altered olfactory  
235 processing.

236 While the behavioral deficits in typical ASD rodent models are well established, the  
237 underlying neural mechanisms are not well understood. The neuropeptides oxytocin and  
238 vasopressin are considered major neurotransmitters implicated in social information processing  
239 and social cognition that have shown to be disrupted in ASD patients<sup>54</sup>. Rodent studies have shown  
240 that these neuropeptidergic systems are involved in several social cognition domains such as social  
241 memory, social/emotional recognition and social reward<sup>55,56,57,58</sup>. Work by us and our collaborators  
242 has provided evidence that PBDEs (and the structural analogues, polychlorinated biphenyls  
243 (PCBs)) disrupt the magnocellular neuroendocrine system responsible for vasopressin production  
244 involved in osmoregulation, cardiovascular function and social behavior<sup>59,60,31,61,62,63,64</sup>. We have  
245 shown that DE-71 exposure *in utero* and during lactation via maternal transfer can nearly abolish  
246 vasopressin immunoreactivity in the activated supraoptic (SON) and paraventricular nucleus  
247 (PVN) of the hypothalamus<sup>63</sup>. Therefore, we also tested the hypothesis that PBDEs disrupt gene  
248 expression of prosocial neuropeptides such as vasopressin, oxytocin, PACAP and their receptors  
249 in regions of the social brain network, which may underlie deficient social behavior<sup>65,66,67</sup>.

250 To lend insight to whether early-life exposure to PBDEs can produce ASD-relevant  
251 phenotypes, we exposed mouse dams to a commercial mixture of PBDEs, DE-71, at low doses to  
252 mimic chronic, low-level exposure to BDE congeners and doses encountered by infants and

253 toddlers. We demonstrate that perinatal exposure to DE-71 produces dose-responsive deficient  
254 social recognition memory and general memory, altered olfactory function and altered  
255 neuromolecular phenotypes in brain regions that coordinate complex social behaviors. To the best  
256 of our knowledge, this study is the first to show a comprehensive profile of autistic-relevant  
257 behavior and comorbidities in female offspring impacted by maternal transfer of PBDEs.  
258 Concomitant characterization of ASD-relevant behavioral and neurochemical phenotypes  
259 exhibited by offspring developmentally exposed to and reprogrammed by DE-71, provides an  
260 integrative framework for exploring environmental risk factors that may contribute to the  
261 increasing incidence of ASD. A portion of our findings has been published in preliminary form<sup>68</sup>.

262

## 263 **Materials and Methods**

264

### 265 *Animal Housing and Care*

266 C57Bl/6N mice were generated using breeders obtained from Charles River Labs (West  
267 Sacramento, CA). Mice were housed 2-4 per cage in standard polycarbonate plastic cages with  
268 corn-cob bedding in a non-specific pathogen free vivarium and kept on a 12:12-h light:dark cycle  
269 in a controlled temperature (21.1–22.8°C) and humidity (20-70%) environment. Mice were  
270 provided rodent chow and water *ad libitum*. Care and treatment of animals was performed in  
271 compliance with guidelines from and approved by the University of California Riverside  
272 Institutional Animal Care and Use Committee (AUP#00170026 and 20200018).

273

### 274 *Experimental Design and DE-71 Exposure*

275 DE-71 (technical pentabromodiphenyl oxide; Lot no. 1550OI18A), was obtained from  
276 Great Lakes Chemical Corporation (West Lafayette, IN). DE-71 dosing solutions were prepared  
277 in corn oil vehicle (VEH/CON) to yield two doses: 0.1 mg/kg/day (L-DE-71) and 0.4 mg/kg/d (H-  
278 DE-71) in 2 ml/kg body weight. The DE-71 doses were selected to contain the same molar  
279 concentrations of BDE-47 used in mouse studies<sup>46,69</sup>. BDE-47 is the primary congener in human  
280 breast milk<sup>70,16</sup>.

281 Offspring were exposed to DE-71 via maternal transfer using a 10-week dosing regimen  
282 as described previously (**Fig.1a**)<sup>71</sup>. Mice were randomly assigned to one of three exposure groups:  
283 corn oil vehicle control (VEH/CON), 0.1 mg/kg/d DE-71 (L-DE-71) or 0.4 mg/kg/d DE-71 (H-  
284 DE-71). This exposure paradigm was chosen to model chronic, low-level exposure to the mother  
285 and PBDE transfer to infant during gestation (2nd and 3rd trimester) and lactation as shown in  
286 humans<sup>72,26,73</sup>. After 3 weeks of pre-dosing, virgin females were paired with an untreated male  
287 using harem-style breeding. The presence of a vaginal plug was designated as gestational day (GD)  
288 0. Females that failed to conceive within 10 d were removed from the study. Litters were not culled  
289 as justified previously<sup>74</sup>. F1 offspring were weaned and PND21 and housed in same-sex cages (2-  
290 4/cage). Dams (F0) and their adult female offspring (F1) were subjected to behavioral testing and  
291 later sacrificed by exsanguination via cardiac puncture under terminal isoflurane anesthesia (5%).  
292 To reduce cross-over effects, behavioral tests were distributed across three different cohorts. Mice  
293 were run through a battery of behavioral tests in the following order for Cohort 1 (mean age): Suok  
294 (PND 46); social novelty preference test (PND 71); 3 chamber social novelty (PND 87); elevated  
295 plus maze (PND 72). The brains of Cohort 1 were collected at sacrifice on PND 108 used in qRT-  
296 PCR. The following tests were performed on Cohort 2: Marble burying (PND 81); olfactory  
297 habituation/dishabituation (PND 79); olfactory preference (PND 102); forced swim test (PND 74).

298 Cohort 3 was subjected to social memory recognition (PND 30); juvenile OFT (PND 31); juvenile  
299 MB (PND 35); novel object recognition (PND 111) tests. F1 and F0 were tested similarly, except  
300 that F0 did not get tested on the Social Recognition Memory Test (SMRT). Analytical  
301 characterization by mass spectrometry was performed on brains from Cohort 1 (PND 110) and a  
302 subset of Cohort 3 (PND 15). Enzyme-linked immunosorbent assays (ELISA) were performed on  
303 plasma from Cohorts 1-3. Whenever possible, the dam was used as the statistical unit of analysis  
304 for F1; unless otherwise indicated. In addition, results were replicated in a minimum of 3  
305 independent experiments.

306

### 307 *Nest scoring*

308 To test for possible effects of DE-71 on maternal parameters, nests of single-housed dams  
309 built from pressed cotton squares (5 x 5 cm; Nestlets; were evaluated at PND 0-1 using a modified  
310 scoring system<sup>75</sup>. Scores were assigned according to the height and closure of the walls  
311 surrounding the nest cavity. Scores were assigned if the nest contained a center (1) and a 50%  
312 border, (2) 75% border (3) or 100% border (4). A score of 5 was given if the nest resembled a  
313 dome (**Supplementary Figure 1**). Nest scores were boosted by 0.5 if the nest was elevated. For  
314 interrater reliability the Bland-Altman method was used to calculate bias as the mean of the  
315 differences (0 means two judges are not producing different results) and precision as 95% limits  
316 of agreement (standard deviation of mean bias +/- 1.96) (**Supplementary Figure 1**).

317

### 318 *Congener Analysis in Adult Offspring Brain.*

319 Using gas chromatography coupled with electron capture negative ion mass spectrometry  
320 (GC/ECNI-MS; Agilent 5975N MS), PBDE concentrations were measured in PND110 whole

321 brain homogenate extracts by the Stapleton laboratory at Duke University as described  
322 previously<sup>71</sup>. Briefly, approximately 0.2-0.5 grams of tissue were first ground with clean sodium  
323 sulfate, spiked with two isotopically labeled standards (F-BDE-69 and <sup>13</sup>C BDE-209) and then  
324 extracted using 50:50 DCM:hexane. Extracts were concentrated, measured for lipid content using  
325 a gravimetric analysis, and then purified using acidified silica before analysis for 26 different  
326 PBDE congeners ranging from BDE-30 to BDE 209. Laboratory processing blanks (clean sodium  
327 sulfate only) were analyzed alongside samples to monitor background contamination. Recoveries  
328 of F-BDE-69, and <sup>13</sup>C BDE 209, averaged 91 (+/- 6.9%) and 106 (+/- 19.9%), respectively in all  
329 samples. All samples were blank-corrected on a congener-specific basis using the average  
330 concentrations measured in the laboratory processing blanks. Method detection limits (MDLs)  
331 were estimated using either a signal to noise ratio of 10, or, if analytes were detected in laboratory  
332 blanks, by calculating three times the standard deviation of the laboratory blanks). MDLs differed  
333 by congener and ranged from 0.8 (BDE-47) to 6.6 ng/g (BDE-206).

334

### 335 ***PBDE Congener Analysis in Perinatal Offspring Brain***

336 Due to force majeure, i.e. SARS-CoV-2 pandemic, we were unable to carry out planned analytical  
337 characterization of PND 15 tissues in collaboration with the Stapleton lab, therefore, the MS  
338 system in the Schramm lab was used. The performance of both methods were comparable,  
339 especially with regard to the limit of quantification. Using High Resolution Gas Chromatography–  
340 High Resolution Mass Spectrometry (HRGC/HRMS), PBDE concentrations were measured in  
341 P15 whole brain homogenates (0.1-0.2 g) as described<sup>76</sup>. PBDE analytes included 37 PBDE  
342 congeners (BDE-7, 10, 15, 17, 28, 30, 47, 49, 66, 71, 77, 85, 99, 100, 119, 126, 138, 139, 140,  
343 153, 154, 156, 176, 180, 183, 184, 191, 196, 197, 201, 203, 204, 205, 206, 207, 208, 209). Samples

344 were ground and homogenized to a fine powder under liquid nitrogen. Each sample (100-200 mg)  
345 was mixed with CHEM TUBE-Hydromatrix (Agilent Technologies) and spiked with <sup>13</sup>C-labelled  
346 PBDE standard mix (BFR-LCS, Wellington Laboratories). For pressurized liquid extraction  
347 (Dionex ASE 200) n-hexane/acetone (3:1, v/v) was used at 120°C and 12 MPa. The volume of the  
348 extract was reduced to ~5 mL using a vacuum rotary evaporator. Samples were purified using an  
349 automated system (DEXTech, LCTech, Germany), where the sample was passed and fractionated  
350 over an acidic silica, alumina and carbon column. Concentrated extracts were spiked with the  
351 recovery standard (BFR-SCS, Wellington Laboratories) and analyzed by HRGC/HRMS (Agilent  
352 6890/Thermo MAT95 XL) using electron impact ionization (EI), in the selected ion monitoring  
353 mode. The instrumental parameters are listed in **Supplementary Table 1**. Average recovery for  
354 <sup>13</sup>C-labelled PBDE standards ranged between 40 and 120%. All samples were blank-corrected on  
355 a congener-specific basis using the average of three procedural blank samples. Analytes with  
356 concentrations after blank correction that were lower than three times the standard deviation of the  
357 blank values or were not detected before blank correction were considered as not detectable (n.d.).  
358 The limit of quantification (LOQ) of the instrumental methodology was considered as a  
359 signal/noise ratio of 9:1 (**Supplementary Table 2**). Congener concentrations that were below  
360 detection limit were assigned a randomly generated value of LOQ/2. The accuracy of our method  
361 was confirmed by successful participation in interlaboratory comparison studies.

### 362 ***Comparison of MS Methods***

363 The GC/ECNI-MS method used the ECNI ionization mode to improve sensitivity. The  
364 latter provides equal sensitivity to HRGC/HRMS that uses electron impact.

365

### 366 ***Neurobehavioral Testing Paradigms***

367           At least 30 min prior to testing, mice were moved to a designated behavior room. Ethanol  
368 (70%) was used to remove debris and odors between individual mouse trials. Unless stated  
369 otherwise, mouse behavior was scored using automated video-tracking software (Ethovision XT  
370 15, Noldus) or manual scoring software (BORIS<sup>77</sup> or JWatcher), performed blind to treatment by  
371 trained observers. Mice were tested between 10am and 4 pm during the light phase under bright  
372 light conditions, unless otherwise stated.

373

### 374 *Social Novelty Preference*

375           Social novelty preference (SNP) was conducted and analyzed according to methods  
376 adopted from published protocols<sup>50</sup>. Briefly, mice were habituated for 30 min to a polycarbonate  
377 cage identical to their home cage (27 x 15 cm), followed by 30 min to two wire interaction corrals  
378 (11 x 10 x 10 cm) placed on each side of the cage. During a 5-min training trial, a stimulus mouse  
379 was placed into one corral while the empty corral was removed. After a 30 min retention period,  
380 social recognition was assessed in the following 5 min test, during which the test mouse explored  
381 the same stimulus mouse (now familiar mouse) versus a novel stimulus mouse. Prior to testing  
382 days, sex- and age-matched conspecific stimulus mice were trained to stay in corrals for 15 min x  
383 3/d for 7-14 d. Stimulus mice were single-housed in order to preserve their unique scent.  
384 Investigation by test mouse was measured as time spent sniffing (snout within 2 cm of stimulus).  
385 Test robustness was measured using an Investigation Index calculated as the ratio of time spent  
386 investigating the novel mouse to total investigation time during training period. (**Supplementary**  
387 **Figure 2**). Social recognition is represented as time spent investigating novel stimulus as percent  
388 of total investigation time in the test period. To evaluate between group differences, a

389 Discrimination Index was calculated as the ratio of time spent investigating Novel - Familiar/total  
390 investigation time in test period.

391

### 392 ***Three-Chamber Sociability Task***

393 Sociability was assessed as described<sup>78</sup>. In brief, during the first habituation phase, test  
394 mice were habituated for 10 min to the center chamber of a Plexiglass three-chambered apparatus  
395 (22 x 40 x 23 cm). Next, the retractable doors partitioning the chambers were opened to permit  
396 exploration of all three chambers (second habituation phase). Sociability was tested in the  
397 following 10 min session, during which the test mouse was permitted to explore an empty 9 x 27  
398 cm corral (novel object) versus a mouse placed inside another corral (novel social object). Inherent  
399 side preference during the second habituation phase was evaluated as Right Chamber time - Left  
400 Chamber time / Right Chamber time + Left Chamber time x 100. Mean values for test mice  
401 meeting the exclusion criterion (0 +/- 15%) are shown in **Supplementary Figure 2**. Sociability  
402 was analyzed during the subsequent testing phase both as time spent in chamber and time spent  
403 sniffing within 2 cm of stimulus.

### 404 ***Marble burying and Nestlet Shredding Tests***

405 The Marble Burying (MB) and Nestlet Shredding Tests were utilized for analysis of elicited  
406 repetitive behavior in rodents that is considered analogous to those observed in autistic  
407 individuals<sup>51</sup>. During the marble burying test, the test mouse was placed in the corner of a  
408 polycarbonate cage (19 x 29 x 13 cm) containing 5 cm of bedding<sup>79</sup> allowed to interact for 30 min  
409 with an array of equidistantly aligned marbles (8 x 4 for adults or 6 x 4 for juvenile). A minimum  
410  $\frac{2}{3}$  of the marble was defined as being buried in the 32-marble array and  $\frac{1}{2}$  buried in the 20-marble  
411 array. Images of the cage were scored by 2-3 investigators who were blind to treatment and a mean



412 score obtained. For interrater reliability on marble burying the Bland-Altman method was used to  
413 calculate bias as the mean of the differences (0 means two judges are not producing different  
414 results) and precision as 95% limits of agreement (standard deviation of mean bias +/- 1.96)  
415 (**Supplementary Figure 3**). After a 5 min rest period, the test mouse was placed into another cage  
416 of the same size with 0.5 cm of bedding containing a pre-weighted square of cotton fiber (Nestlet).  
417 After 30 min, the remaining Nestlet was weighed and percent shredding calculated.

418

### 419 *Innate Olfactory Preference Test*

420 To test the ability to detect attractive or aversive odorants, the innate Olfactory Preference  
421 Test (OPT) was performed and analyzed according to methods described<sup>80</sup>. Mice were habituated  
422 to the experimental conditions by being placed individually into an empty test cage (19 x 29 x 13  
423 cm) and sequentially transferred to three other cages every 15 min. After the final habituation,  
424 mice were transferred into the test cage containing a filter paper (2 x 2 cm) infiltrated with 500  
425 uL of a fresh sample of test odorants: 10% peanut butter, 1% vanilla, 1% butyric acid, or deionized  
426 water. The four test odorants were presented to the test mouse in a randomized order. Time spent  
427 sniffing the filter paper during the 3-min odorant trials was video-recorded and later measured.  
428 Cages were cleaned with 70% ethanol after each mouse was tested.

429

### 430 *Olfactory Habituation Test*

431 The ability of mice to detect and differentiate social and non-social odorants was examined  
432 using the Olfactory Habituation/Dishabituation test (OHT)<sup>51</sup>. OHT involves presenting a test  
433 animal with various odorants, typically: (1) water, (2) two non-social odorants (almond and  
434 banana) and (3) two social odorants (obtained from cage bedding). Mice were acclimated for 45

435 min to an empty cage with a cotton-tipped applicator inserted through the water bottle hole in order  
436 to reduce the novelty of the applicator during test sessions. Non-social odors were prepared from  
437 extracts immediately before testing. They included: (1) deionized water; (2) almond (1:100  
438 dilution); (3) banana (1:100) (McCormick). Two social odors were obtained the morning of test  
439 day by swiping applicator across the bottom of stimulus cages containing soiled bedding from sex-  
440 matched conspecifics. Cages housed 3-4 mice and bedding was at least 3 d old. Stimuli were  
441 presented in 2-min trials in the following order: water x 3, almond x 3, banana x 3, social odor 1 x  
442 3, social odor 2 x 3. Time spent sniffing the applicator was recorded with a stopwatch. Parameters  
443 measured were habituation, defined as a decrement in olfactory investigation of the same odor  
444 after repeated presentations and dishabituation, defined as a reinstatement of olfactory  
445 investigation upon presentation of a new odorant.

446

#### 447 ***Social Recognition Memory Test***

448 A two-trial social recognition memory test (SMRT) was performed as previously  
449 described<sup>66</sup> to test assess long-term social recognition memory. Test mice (PND 28-40) were  
450 exposed to a juvenile sex-matched conspecific stimulus mouse (PND 15-32) during two 3 min  
451 trials following an intertrial delay of 24 h. For each experiment, test mice were individually placed  
452 into polycarbonate cages (27 x 16 x 12 cm) and allowed to habituate for 1 h under dim conditions.  
453 A juvenile sex-matched conspecific was then placed into the cage, and the mice were allowed to  
454 interact for 3 min (Trial 1). In Trial 2, performed 24 h later, the same test mouse was exposed to  
455 either the familiar (stimulus from Trial 1) or a novel stimulus. Each stimulus was not used more  
456 than 4 times. The tests were digitally recorded and scored for social investigation behavior. To  
457 evaluate the differences in ability to form a long-term social memory a Recognition Index was

458 calculated as the ratio of the duration of investigations on Day 2 and Day 1.

459

### 460 *Novel Object Recognition Test*

461 The novel object recognition test (NORT) was used to assess non-social recognition  
462 memory. We adapted a two-day protocol with a short- and long-term retention time. On Day 1,  
463 the test mouse was habituated to an empty square Plexiglas open field arena (39 x 39 x 38 cm) for  
464 15 min as described<sup>81</sup>, followed by a 20 min rest in home cage. During the acquisition phase, the  
465 test mouse was placed in the open field containing two identical objects (F vs F') and allowed to  
466 freely explore the environment and objects. During the short-term memory (30 min retention)  
467 testing session, the test mouse was again placed in the apparatus and allowed to explore a familiar  
468 and novel object (F vs N). After a 24 h retention time (Day 2), long term memory was assessed by  
469 placing mice into the open field containing both the familiar and a new novel object (F vs N'). All  
470 test/train sessions lasted 5 min. Preference for the novel object was expressed as the ratio of time  
471 exploring the novel relative to the total exploration time. To evaluate the differences in ability to  
472 form NOR memory, the Discrimination Index was calculated as the ratio of the difference in  
473 exploration time between novel and familiar objects relative to total exploration time, where 0  
474 indicates equal preference. Test objects were first validated for intrinsic preference. After analysis  
475 of the data using Ethovision, the exclusion criteria was the lack of travelling a distance within one  
476 standard deviation of the group mean for trials 1 and 2 and/or any animal not visiting the familiar  
477 or novel target zones at least 6 times.

### 478 *Suok*

479 Suok is an elevated platform behavioral paradigm used to analyze anxiety, anxiety-induced  
480 motor impairments and motor-vestibular anomalies in mice. The apparatus consists of a smooth

481 aluminum rod (2 m long, 3 cm diameter) elevated to 20 cm and fixed to two clear acrylic walls as  
482 described<sup>82</sup>. Bilateral to a central segment (38 cm) of the aluminum rod are 10 cm segments  
483 labeled by line markings. After acclimation to the dimly lit testing room, several behaviors are  
484 scored over a 5 min trial: (1) horizontal and locomotor (normalized) activity, assessed by number  
485 of segments traveled, (2) sensorimotor coordination -measured by the number of hind leg slips and  
486 falls from the rod, (3) exploratory behavior like side looks and head dips, (4) anxiogenic behaviors  
487 like increased latency to leave the central zone and unprotected stretch attend postures (SAP), in  
488 which the mouse stretches forward and retracts without moving its feet- considered a non-social  
489 form of ambivalence, (5) vegetative responses (combined number of urinations and defecation  
490 boli), and (6) autogrooming behaviors. Hyperactivity, loss of sensorimotor coordination, increased  
491 anxiety and displacement behavior are represented by elevated values for #1, 2, 4 and #5, and 6.  
492 Measures were recorded manually by stopwatch. Locomotor activity was calculated as total test  
493 time minus time spent immobile in center.

494

### 495 ***Open Field Test***

496 The open field test allows rapid assessment of rodent locomotion, anxiety and habituation  
497 without a training requirement<sup>83</sup>. The open field apparatus, a Plexiglas square arena of 39 x 39 x  
498 37.8 cm was designed as a large, brightly lit, open and aversive environment. Locomotor and other  
499 activity over a 1 h period was digitally recorded and scored using Ethovision for distance traveled,  
500 velocity and total time in periphery (10 cm adjacent to wall) and center.

### 501 ***RNA Extraction From Brain Micropunches***

502 At sacrifice under isoflurane anesthesia whole brains were rapidly dissected and snap  
503 frozen in 2-Methylbutane over dry ice. Brains were cryosectioned (0.3 mm thick) coronally and

504 sections mounted on sterile glass slides and stored at -80°C. Five regions of interest were punched  
505 out bilaterally from tissue sections under a stereomicroscope using a microdissecting needle (16-  
506 gauge) adapted from the Palkovits micropunch technique<sup>84</sup>. The anatomical precision was  
507 determined based on the atlas of Paxinos and Franklin and cresyl violet stained sections of  
508 reference mouse brains. Tissue punches were immediately homogenized in TRIzol Reagent  
509 (Thermo Fisher Scientific, USA) using a hand-held homogenizer. Total RNA was prepared via a  
510 modified partial phenol-methanol extraction protocol (RNeasy Micro Kit, Qiagen, USA). Purity  
511 and quality of RNA were assessed by determining the optical density (OD) photometrically at  
512 280 nm and 260 nm (NanoDrop ND-2000, Thermo-Fisher Scientific Inc., Waltham, MA, USA).  
513 RNA integrity was assessed using an Agilent 2100 Bioanalyzer (Agilent Technologies Inc. Santa  
514 Clara, CA, USA) (**Supplementary data 2**).

#### 515 ***Quantitative polymerase chain reaction (qRT-PCR)***

516 RT-qPCR was used to quantitate mRNA transcripts for pro-social peptides, AVP, OXT,  
517 PACAP and their receptors. Oligonucleotide PCR primers were custom designed and synthesized  
518 or ordered as predesigned assays from Integrated DNA Technologies. Primers were designed to  
519 meet several criteria using NCBI Primer Blast and then optimized by testing against  
520 complementary DNA generated using RT-PCR and gel electrophoresis. Only primers that gave  
521 single-band amplicons in the presence of RT and that matched the base length of the predicted  
522 target and which yielded 90% to 110% efficiency were selected (**Table 1**). *Oxtr* and the reference  
523 gene, *ActB*, were multiplexed using hydrolysis probes with double-quenchers. For all other  
524 primers, intercalating dye chemistry was used. RT-qPCR was performed on a CFX Connect  
525 thermocycler with the Luna Universal or Probe one-step qPCR Master Mixes (New England  
526 Biolabs, Ipswich, MA). RNA (1-4 ng) was used per reaction run in triplicate. In each experiment,

527 no-template controls (NTCs) without mRNA were run to rule out extraneous nucleic acid  
 528 contamination and primer dimer formation. Negative RT controls, which contained the complete  
 529 RNA synthesis reaction components without the addition of the enzyme reverse transcriptase (RT)  
 530 were used to rule out presence of genomic DNA (gDNA). Fold-change gene expression was  
 531 measured relative to the reference gene, *ActB*, and differential gene expression was determined  
 532 compared to null group (VEH/CON) using the Pfaffl method. Molecular work was carried out in  
 533 adherence to MIQE guidelines<sup>85</sup> (Supplementary data 2).

534

535

536 **Table 1. RT-qPCR Primers and Target Genes**

| Target Gene                                           | Gene Symbol      | GenBank Accession Number | Primer/Probe Sequence                                                                             | Exon Location Fwd/Rv | E (%)         | Tm (°C) Fwd/Rv  | Product Size (bp) | Anneal Temp (°C) |
|-------------------------------------------------------|------------------|--------------------------|---------------------------------------------------------------------------------------------------|----------------------|---------------|-----------------|-------------------|------------------|
| Arginine vasopressin                                  | <i>Avp</i>       | NM_009732.2              | F: CTCAACACTACGCTCTCCGC<br>R: CAGCAGATGCTTGGTCCGA                                                 | 1/1-2                | 98            | 60.8/57.9       | 173               | 55               |
| Arginine vasopressin receptor 1A                      | <i>Avplar</i>    | NM_16847.2               | F: GCTGGACACCTTTCTTCATCGTC<br>R: CTGTTCAAGGAAGCCAGTAACG                                           | 1/2                  | 89.1          | 61.7/59.5       | 115               | 55               |
| Adenylate cyclase activating polypeptide 1            | <i>Adcyap1</i>   | NM_009625.3              | F: AGGTGCTGGTGTGGAATGAATGC<br>R: AATGCATGAGGGCAAGGTTAGGAA                                         | 5                    | 95            | 60.2/60.7       | 176               | 55               |
| Adenylate cyclase activating polypeptide 1 receptor 1 | <i>Adcyap1r1</i> | NM_007407.4              | F: TTCCTACTGCGTGGTGTCCAACCT<br>R: ATATCCCAGCATCCCGCATCATCA                                        | 10/11-12             | 96.3          | 60.3/60.3       | 199               | 55               |
| Oxytocin                                              | <i>Oxt</i>       | NM_011025.4              | F: CCGAAGCAGCGTCTTTT<br>R: CTTGGCTTACTGGCTCTGAC                                                   | 1/2                  | 96.9          | 55.7/55.5       | 131               | 60               |
| Oxytocin receptor                                     | <i>Oxtr</i>      | NM_001081147.2           | F: CGCACAGTGAAGATGACCTT<br>R: ATGGCAATGATGAAGGCAGA<br>P: 6-FAM-CTTCGTGCA-ZEN-GATGTGGAGCGTTCT-IBFQ | 1/2                  | 107.1         | NA              | 131               | 60               |
| Beta Actin                                            | <i>β-Actin</i>   | NM_007393.5              | F: GATTACTGCTCTGGCTCCTAG<br>R: GACTCATCGTACTCCTGCTTG<br>P: HEX-CTGGCCTCA-ZEN-CTGTCCACCTTCC-IBFQ   | 5/6                  | 99.6<br>101.7 | 55.0/54.4<br>NA | 147               | 60               |

537

538 Abbreviations: F, forward; R, reverse; P, probe; E, primer efficiency; Tm, melting temperature;  
 539 bp, base pair; ZEN/IBFQ, ZEN-Iowa Black FQ; FAM, Fluorescein; HEX, Hexachloro-  
 540 fluorescein.

541

542 **Enzyme Immunoassays**

543 Blood was collected by cardiac puncture and the plasma separated at 2000 x g  
544 centrifugation for 20 min at 4°C. Plasma levels of the neuropeptides OXT and arginine8-  
545 vasopressin (Arg<sup>8</sup>) were quantified using commercially available ELISA kits from Arbor Assays  
546 (Ann Arbor, MI USA, OXT, K048-H1, Arg<sup>8</sup>, K049-C1) and Enzo Life Sciences (OXT,  
547 ADI901153A0001, Arg<sup>8</sup>, ADI-900-017) following the manufacturer's instructions. For the Arbor  
548 Assay kits, in order to reduce the non-specific binding, samples were first treated using the  
549 acetone-based extraction solution followed by vacuum lyophilization of the resulting supernatant.  
550 For oxytocin, the colorimetric reaction product was read as optical density at 450 nm on a plate  
551 reader (SpectraMax 190, Molecular Devices). The kit has a sensitivity of 1.7 pg/sample in a  
552 dynamic range of 16.38-10,000 pg/mL. ARG<sup>8</sup> was detected using a luminescence plate reader  
553 (Victor3, Perkin Elmer). The ARG<sup>8</sup> kit has a sensitivity of 0.9 pg/mL in a dynamic range of 1.638-  
554 1,000 pg/mL. For the Enzo Life Sciences kits, samples underwent solid phase extraction using 200  
555 mg C18 Sep-pak columns as previously described<sup>86</sup>. Plasma oxytocin and arginine vasopressin  
556 were quantified by interpolating absorbance or luminosity values, respectively, using a 4-  
557 parameter-logarithmic standard curve (MyAssays).

558

### 559 *Statistical Analyses*

560 Statistical analysis was performed using GraphPad Prism (version 8.4.3 San Diego, CA,  
561 USA). Within groups comparison was performed using paired Student's t test or one-way ANOVA  
562 if more than two groups were compared. Between groups comparisons were accomplished using  
563 One-way, Two-way or Mixed model ANOVA with or without a repeated measures design. Non-  
564 parametric statistical tests (i.e., Kruskal-Wallis H test) were used when normality and/or equal  
565 variances assumptions were not met as measured using the Shapiro-Wilk and F-tests. If an equal

566 variance assumption was not met, a Brown-Forsythe ANOVA or Welch's correction was used.  
567 Post-hoc comparisons were performed using appropriate tests. Technical outliers were excluded  
568 when animals were unable to perform behavioral tests. Type 1 error rate ( $\alpha$ ) was set at 0.05; F and  
569 *P* values are presented in the figure legends or Supplemental statistical information. The data are  
570 expressed as the mean  $\pm$  s.e.m, as mean with individual values as 'before-after' bars or as median  
571 and inter quartile range representing minimum and maximum values in whisker plots.

572

## 573 **Results:**

574

### 575 ***DE-71 Dosing Paradigm and Maternal Parameters***

576 C57Bl/6 mice dams were exposed to DE-71 and later investigated along with the F1 female  
577 offspring (**Fig. 1**). Using this dosing paradigm, we have previously reported no differences in litter  
578 size at birth, secondary sex ratio, nor gestational maternal parameters<sup>71</sup>. Dams exposed to DE-71  
579 did not build inferior nests and F1 litters at PND 46 had normal body mass relative to VEH/CON  
580 (**Supplementary Figure 1**). In combination, these data indicate that perinatal DE-71 exposure  
581 does not interfere with pup health, maternal nest quality nor related behaviors shown to be affected  
582 by exposure to PCBs, a structural/functional analogue class of PBDEs<sup>87</sup>.

583

### 584 ***PBDE congener analysis in offspring brain***

585 PBDE congener content was determined using HRGC/HRMS or GC/ECNI-MS in F1  
586 female brain from offspring during the lactational period (PND 15) or adults (PND 110),  
587 respectively. Raw values are listed by exposure group in **Supplementary Table 3, 4, 5. Figure 1**  
588 **b,c** shows a significant increase in  $\sum$ PBDEs in L-DE-71 and H-DE-71 relative to VEH/CON



589 ( $P<.05$ ), confirming that the dosing regime led to maternal transfer of PBDEs. Accumulation of  
590 PBDEs in PND 15 (but not PND 110) was dose-dependent ( $P<.05$ ). Mean  $\sum_{14}$ PBDE values in  
591 exposed F1 at PND 15 were 78 and 296 ng/g w.w. for L-DE-71 and H-DE-71, respectively. At  
592 PND 110 the corresponding mean total PBDEs (of which only BDE-153 was above detection limits) were  
593 0.53 and 1.5 ng/g w.w. and 113-169 ng/g when normalized to lipid weight (l.w.). For PND 15 the  
594 range of BDE concentrations in L-DE-71 and H-DE-71 were as follows, respectively: BDE-17  
595 (0.021, 0.006%), BDE-28 (0.088, 0.126%), BDE-47 (12.2, 17.4%), BDE-49 (0.014, 0.017%),  
596 BDE-85 (1.63, 1.41%), BDE-99 (36.3, 34.0%), BDE-100 (12.2+, 11.3%), BDE-138 (0.572,  
597 0.488%) BDE-139 (2.90, 2.70%), BDE-140 (0.408, 0.288), BDE-153 (30.2, 29.5%), BDE-154  
598 (3.12, 2.48), BDE-183 (0.244, 0.168), BDE-184 (0.185, 0.182%) (**Fig. 1d**). Collectively, 7  
599 congeners (BDE-47, -85, -99, -100, -139, -153, -154) in L-DE-71 and H-DE-71 accounted for  
600 98.5, 98.7% of all PBDEs penetrating the brain during lactation, respectively. These same 7  
601 congeners comprise 97.1% of the DE-71 mixture. The remaining 7 of 14 congeners detected in  
602 our samples, made up the remaining 1.5, 1.3%, respectively: BDE-17, 28, 49, 138, 140, 183 and  
603 184. **Figure 1e** shows that, with the exception of BDE-17, 28, 49 and 184 in L-DE-71 and BDE-  
604 49 in H-DE-71, all 14 congeners detected showed significantly elevated concentrations in DE-71  
605 exposed PND 15 offspring relative to VEH/CON ( $P<.05$  - $.01$ ). Of note, BDE-153 was ~10-fold  
606 enriched and BDE-47 was slightly depleted (~2-fold) relative to the DE-71 mixture as reported  
607 previously<sup>32</sup>.

608 By PND 110, the BDE composition in F1 brain was limited to BDE-153 (**Fig. 1f**), which  
609 was significantly elevated in L-DE-71 and H-DE-71 relative to VEH/CON ( $P<.01$  and  $P<.05$ ).  
610 BDE-153 at ppb (and an additional 6 congeners) is detectable in *postmortem* brain samples from  
611 4-71 year-old neurotypical controls and autistic humans born in 1940 to 2000<sup>88</sup>.

612

613 ***Early-life exposure to DE-71 produces deficits relevant to core symptoms of autism***

614 ***Social novelty preference.*** Testing mice on a social novelty preference (SNP) test has been  
615 suggested to be ethologically relevant to symptoms observed in autistic behavior<sup>50</sup>. On this test,  
616 all F1 exposure groups except the L-DE-71 F1 group ( $P<.05$ ) showed a preference for the novel  
617 over familiar stimulus (**Fig. 2a**), and this was also represented in the recognition index vs  
618 VEH/CON (**Fig. 2b**,  $P<.05$ ). In contrast, there was no effect of exposure in F0 and all groups  
619 showed a preference for novel stimulus (**Fig. 2c**,  $P<.0001$ ) and no differences were observed in  
620 recognition index (**Fig. 2d**). The investigation index for F1 and F0 approached 1 (**Supplementary**  
621 **Figure 2**) indicating that the reduced exploration of novel over familiar shown by L-DE-71 F1  
622 was not due to a decrease in total investigation time indicating no lack of participation.

623 ***Sociability.*** To determine social interest, an independent social cognition domain, we  
624 examined mouse behavior on a 3-chamber sociability test. All F1 groups (VEH/CON, L-DE-71,  
625 H-DE-71) showed preference for a novel social stimulus relative to a non-social novel stimulus as  
626 measured by sniffing time (**Fig. 2e**,  $P<.05$ , .01, .05), respectively, indicating normal sociability.  
627 Using chamber time VEH/CON and L-DE-71, but not H-DE-71 F1, showed a preference for social  
628 stimulus (**Fig. 2g**,  $P<.05$ ,  $P<.01$ , ns). Sniffing time has been suggested to have superior validity  
629 over chamber time scores since active behaviors that are most directly related to social  
630 investigation are captured<sup>89</sup> since the physical proximity allows for transmission of volatile and  
631 nonvolatile odorants<sup>48,90,89</sup>. For F0, chamber (**Fig. 2f**,  $P<.01$ ) and sniffing time scores were  
632 congruent and no effect of exposure was found (**Fig. 2h**  $P<.05$  for VEH/CON and L-DE-71, and  
633  $P<.01$  for H-DE-71). As a measure of test robustness there was no indication of side preference  
634 during training for F1 and F0 (**Supplementary Figure 2**).

635            **Repetitive Behavior.** On the marble burying test, which measures repetitive and  
636 perseverative behavior in rodents<sup>91</sup>, L-DE-71 (but not H-DE-71) adult F1 buried a significantly  
637 greater number of marbles relative to VEH/CON (**Fig. 2i**,  $P < .05$ ). A subgroup of F1 was tested at  
638 PND 30, but no group differences were measured, possibly indicating age-related physical  
639 hypoactivity, reduced habituation to test arena or a latently-emerging impact of PBDEs  
640 (**Supplementary Figure 3**). In contrast, no group differences were seen in F0 (**Fig. 2i**). Mean  
641 values for nestlet shredding were not affected by DE-71 exposure in F1. However, in F0, the L-  
642 DE-71 group showed a mean reduction in nestlet shredding relative to VEH/CON (**Fig. 2j**,  $P < .05$ ).  
643 Less nestlet shredding did not translate into poorer maternal nest scores, however (**Supplementary**  
644 **Figure 1**).

645

#### 646 ***Exposure to L-DE-71 but not H-DE-71 reduces long-term social recognition memory in F1***

647            We determined that SNP scores requiring a 30 min memory retention were abnormal in  
648 exposed F1 but not F0. To test the hypothesis that DE-71 compromises consolidation of *long-term*  
649 social recognition memory, we subjected F1 to a social recognition memory test (SMRT)<sup>66</sup>. On  
650 this test mice with intact memory exhibit less time investigating a familiar juvenile conspecific 24  
651 h after a first exposure. **Figure 3a** shows that VEH/CON and H-DE-71 mice were able to form a  
652 social recognition memory of the stimulus by Day 2 since they spent significantly less time with a  
653 familiar stimulus mouse ( $P < .05$  and  $P < .0001$ , respectively). We used a one-sample t-test to  
654 determine if the sample mean recognition index (RI) was statistically different from previously  
655 reported mean RI of 0.65 (Kogan et al, 2000; Tanimizu et al, 2017). Mean RI values for F1 were  
656 0.71 for VEH/CON and significantly *lesser* for H-DE-71 (0.56,  $P < .05$ ), suggesting enhanced  
657 recognition memory (**Fig. 3b**). In contrast, L-DE-71 F1 showed an apparently *greater* RI (mean

658 RI, .85,  $P=.07$ ), suggesting they had deficient long-term social recognition memory (**Fig. 3 a,b**).  
659 Next, we examined investigation time with a second novel stimulus mouse on Day 2 to determine  
660 whether the reduction of investigation time on Day 2 is specific to social memory formation and  
661 not due to disengagement. In **Figure 3c**, no significant reduction of investigation time was noted  
662 for VEH/CON and H-DE-71, suggesting that the reduction is specific to recognition memory  
663 formation (familiar mouse on Day 1). In contrast, L-DE-71 F1 exhibited a significant reduction  
664 in investigation time ( $P<.05$ ), further supporting the results above. In this context, we used a one-  
665 sample t-test to determine if the sample mean RI is statistically different from a previously reported  
666 mean RI of 1. L-DE-71 showed a significantly lower RI (.89,  $P<.05$ ). During test optimization  
667 using untreated controls the 3 but not 1 min of social exposure on Day 1 was sufficient to form a  
668 memory on Day 2 ( $P<.01$ ) as reported<sup>66</sup> (**Supplementary Figure 4**). In summary, these results  
669 indicate that developmental exposure to DE-71 at 0.1 mg/kg/d significantly reduces long-term  
670 social recognition memory in F1.

671

672 ***Exposure to L-DE-71 compromises short-term novel object recognition memory in adult F1 and***  
673 ***F0***

674 Having found that DE-71 exposure produces significant impairment in the SNP and SMRT,  
675 we tested the hypothesis that DE-71 exposure also interferes with non-social recognition memory.  
676 Using a novel object recognition memory test (NORT), **Figure 4a** shows that L-DE-71 F1 did not  
677 display preferential exploration of the novel object during the Day 1 testing, as did the VEH/CON  
678 and H-DE-71 ( $P<.01$ ) indicating that F1 exposed to 0.1 mg/kg DE-71 did not discriminate between  
679 objects presented 30 min earlier in the familiarization phase. This was corroborated using a  
680 discrimination index which showed that values for VEH/CON and H-DE-71 were  $>0$ , indicating

681 memory for previously encountered objects (**Fig. 4b**,  $P < .05$ ). In contrast, L-DE-71 group displayed  
682 a negative mean discrimination index (greater preference for familiar object,  $P < .01$ ), which was  
683 also significantly reduced compared to VEH/CON ( $P < .001$ ). Representative dwell time maps in  
684 the open field arena showed preference for novel object (right corner) for VEH/CON and H-DE-  
685 71 on Day 1 (**Fig. 4c**). In contrast, L-DE-71 showed less exploration of novel relative to familiar  
686 object. On Day 2 all exposure groups preferred novel over familiar object and showed similar  
687 discrimination index mean values and dwell times after a 24 hr retention time (**Fig. 4g, h, i, j**).  
688 There were no effects of exposure on locomotion (**Fig. 4e, f, k, l**) as indicated by raster plots (**Fig.**  
689 **4d, j**) Both L-DE-71 and H-DE-71 exposed dams showed similar short-term memory deficits as  
690 L-DE-71 exposed F1 offspring (**Supplementary Figure 5**).

691  
692 *Abnormal social behavior in F1 produced by DE-71 exposure is not due to deficits in general*  
693 *olfactory processing.*

694 In order to examine if DE-71-induced deficits observed in social recognition ability were  
695 due to insufficient olfactory ability, we subjected female offspring to an olfactory preference test.  
696 **Figure 5a** shows that all mice including those treated with DE-71 displayed increased odor  
697 sniffing duration for peanut butter over water ( $P < .05-.0001$ ), butyric acid ( $P < .05-.0001$ ), and  
698 vanilla ( $P < .05-.001$ ). Similar results were obtained for dams (**Fig. 5b**). These results indicate that,  
699 like VEH/CON, DE-71 exposed offspring were able to process sensory signals from different non-  
700 social odors with enough sensitivity to show preference for peanut butter over others..

701  
702 *DE-71 exposure alters olfactory discrimination of social odors in F1*

703 We used an olfactory habituation/dishabituation test to measure olfactory discrimination.

704 Table 2 indicates the results of the habituation/dishabituation test. The F1 VEH/CON group  
705 displayed olfactory habituation to all non-social odors and social odors except non-social odor 2  
706 (banana) as indicated by the decline in time spent sniffing by trial 3 (**Fig. 5c**). F1 VEH/CON  
707 displayed olfactory dishabituation when transitioning to a new odor except from non-social 2  
708 (banana) to social 1 ( $P<.01$ ,  $P<.0001$ ). Both DE-71 groups display deficient habituation and/or  
709 dishabituation for more than 1 odor (**Table 2**). In particular, L-DE-71 showed reduced habituation  
710 to social odor 1 (from trial 1 to 2;  $P<.05$ ; **Fig. 5c**). It appears that banana odor was problematic  
711 for most groups. **Figure 5c** shows that compared to VEH/CON, L-DE-71 and H-DE-71 showed  
712 less dishabituation from social odor 1 to 2 ( $P<.01$ ,  $P<.0001$ ), suggesting that DE-71 produces  
713 reduced olfactory discrimination (hyposmia) especially of social odors, which requires processing  
714 via MOE and VNO<sup>92</sup>. In addition, H-DE-71 also showed reduced dishabituation from non-social  
715 odor 2 to social odor 1 ( $P<.05$ ). An apparently significant effect was also seen for L-DE-71  
716 ( $P=.07$ ). In combination with normal results on the olfactory preference test, these findings  
717 indicate altered social odor discrimination after perinatal exposure to DE-71 potentially associated  
718 with altered signaling through the VNO.

719 Olfactory discrimination of odors in F0 showed normal habituation/dishabituation profiles  
720 compared to VEH/CON (**Fig. 5d**, Table 2). There were no exposure group differences found for  
721 F0.

722 **Table 2. Statistical Results for the Olfactory Habituation/Dishabituation test.**

| Group | Exposure                  | Habituation to water | Dishabituation water to non-social odor 1 | Habituation to non-social odor 1 | Dishabituation non-social odor 1 to non-social odor 2 | Habituation to non-social odor 2 | Dishabituation non-social odor 2 to social odor 1              | Habituation to social odor 1 (Trial 1 to 2) | Habituation to social odor 1 (Trial 1 to 3) | Dishabituation social odor 1 to social odor 2                                                          | Habituation to social odor 2 (Trial 1 to 2) | Habituation to social odor 2 (Trial 1 to 3) |
|-------|---------------------------|----------------------|-------------------------------------------|----------------------------------|-------------------------------------------------------|----------------------------------|----------------------------------------------------------------|---------------------------------------------|---------------------------------------------|--------------------------------------------------------------------------------------------------------|---------------------------------------------|---------------------------------------------|
| F1    | VEH/CON<br>N=14-18        | P<.0001              | P<.01                                     | P<.001                           | NS                                                    | NS                               | P<.0001                                                        |                                             | P<.0001                                     | P<.0001                                                                                                | P<.0001                                     | P<.0001                                     |
|       | L-DE-71<br>N=16-20        | P<.01                | NS                                        | NS                               | NS                                                    | NS                               | P<.0001                                                        |                                             | P<.0001                                     | P<.0001                                                                                                | P<.001                                      | P<.0001                                     |
|       | H-DE-71<br>N=13-15        | P<.0001              | P<.05                                     | P<.05                            | NS                                                    | P<.05                            | P<.0001                                                        |                                             | P<.0001                                     | NS                                                                                                     | NS                                          | NS (P=.09)                                  |
|       | Exposure Group Difference | NS                   | NS                                        | NS                               | NS                                                    | NS                               | - VEH/CON vs L-DE-71, P=.07<br>- VEH/CON vs H-DE-71, P<.05 (b) | -VEH/CON vs L-DE-71, P<.05 (a)              | NS                                          | - VEH/CON vs L-DE-71, P<.01 (bb)<br>- VEH/CON vs H-DE-71, P<.0001 (bbbb)<br>- L-DE-71 vs H-DE-71, <.01 | NS                                          | NS                                          |
| F0    | VEH/CON<br>N=16-18        | P<.0001              | P<.0001                                   | P<.0001                          | NS                                                    | NS                               | P<.0001                                                        |                                             | P<.0001                                     | P<.0001                                                                                                | P<.0001                                     | P<.0001                                     |
|       | L-DE-71<br>N=18-22        | P<.0001              | P<.0001                                   | P<.0001                          | NS                                                    | NS                               | P<.0001                                                        |                                             | P<.0001                                     | P<.0001                                                                                                | P<.01                                       | P<.0001                                     |
|       | H-DE-71<br>N=14-18        | P<.01                | P<.0001                                   | P<.0001                          | P<.05                                                 | P<.01                            | P<.0001                                                        |                                             | P<.0001                                     | P<.0001                                                                                                | P<.0001                                     | P<.0001                                     |
|       | Exposure Group Difference | NS                   | NS                                        | NS                               | NS                                                    | NS                               | NS                                                             |                                             | NS                                          | NS                                                                                                     | NS                                          | NS                                          |

723

724 Summary of the Statistical Results for the Olfactory Habituation/Dishabituation test. Data are  
 725 presented in Figure 4. <sup>a</sup>P<.05, <sup>aaa</sup>P<.001 compared to VEH/CON during habituation. <sup>b</sup>P<.05,  
 726 <sup>bb</sup>P<.01, <sup>bbb</sup>P<.001, <sup>bbbb</sup>P<.0001 compared to VEH/CON during dishabituation.  
 727 ***DE-71 exposure does not promote anxiety nor depressive-like behavior.***

728 Mice were evaluated for anxiety using the EPM test and time spent in closed arms relative  
 729 to open arms was significantly greater in all exposure groups (P<.0001). Similar results were  
 730 obtained in F1 and F0. There was no effect of exposure on number of total arm entries for F1. In  
 731 contrast, the H-DE-71 F0 group exhibited significantly fewer total entries relative to VEH/CON  
 732 (Supplementary Figure 6). Using a forced swim test, depressive-like behavior was measured as  
 733 time spent immobile and there was no significant effect of exposure on time spent immobile for  
 734 F1 nor F0 (Supplementary Figure 6).

735

736 ***Selective effects of DE-71 on Suok test***

737 Using Suok, we measured the effects of DE-71 exposure on locomotion, exploratory  
 738 behavior, sensorimotor coordination and anxiety. Relative to VEH/CON, H-DE-71 (but not L-DE-  
 739 71) F1 showed decreased horizontal activity, as represented by segments crossed (Fig. 6a),

740 decreased locomotion (**Fig. 6b**), decreased exploratory activity (**Fig. 6g**), increased SAP (**Fig. 6i**)  
741 and decreased grooming (**Fig. 6k**). Falls were significantly decreased in H-DE71, but not when  
742 normalized to segments crossed (**Fig. 6d**). In contrast to F1, F0 exposed to L-DE-71 showed  
743 decreased hind leg slips (**Fig. 6e**) and increased SAP relative to VEH/CON (**Fig. 6i**). There were  
744 no significant differences on the other measures.

745

#### 746 *Early-life PBDE exposure does not alter locomotion on the open field test*

747 The open field test informs about locomotion, habituation to novelty and anxiety. All F1  
748 exposure groups showed similar reduced exploratory activity over time (habituation), measured as  
749 reduced distance traveled and velocity over the 1 h test (**Fig. 7 a,b**,  $P<.0001$ ). Between-group  
750 comparisons showed no effect of exposure for F1. These results helped us rule out concerns of  
751 hyper- or hypo-mobility in DE-71 exposed female offspring relative to VEH/CON as reported  
752 after acute exposure to 0.8 mg/kg BDE-99 at PND 10<sup>93,29</sup>. Other studies using chronic exposure of  
753 mouse dams to low doses of BDE-47 (0.1 mg/kg) or -99 (0.6 mg/kg) from gestation through 3rd  
754 week of lactation have shown inconsistent results with both hypoactivity and no effect reported on  
755 the open field test in female offspring<sup>94,95,96</sup>.

756 Exploration time in center and periphery zones for all exposure groups (**Fig. 7c,d**) showed  
757 habituation only in the periphery ( $P<.0001$ ). **Figure 7e** shows that total distance travelled in  
758 periphery was similarly and significantly greater in all exposure groups ( $P<.0001$ ). Another  
759 measure of anxiety, number of fecal boli at 5 and 10 min into the test, indicated increased  
760 emotional reactivity in the L-DE-71 F1 relative to VEH/CON, respectively (**Fig. 7f**,  $P<.05$ ,  $P<.01$ ).

761 For F0 H-DE-71 induced greater distance travelled and velocity in the arena and  
762 exploration in the periphery zone as compared to VEH/CON ( $P<.05-.01$ ) and L-DE-71 ( $P<.05-$



763 .0001). L-DE-71 mice produced more fecal boli at 60 min relative to VEH/CON (**Supplementary**  
764 **Figure 7**).

765

### 766 *DE-71 alters prosocial gene expression in brain regions involved in social behavior*

767 To correlate the behavioral findings with changes in gene expression of the social  
768 neuropeptides that are key mediators of complex social behavior such as vasopressin (*Avp*),  
769 oxytocin (*Oxt*), PACAP (*Adcyap1*) and their receptors, we measured the relative expression of  
770 these genes from micropunches of discrete brain nuclei involved in social behavior: lateral septum,  
771 amygdala, bed nucleus of the stria terminalis (BNST), SON and PVN. **Figure 8** shows that *Avp*  
772 was decreased in BNST of L-DE-71 ( $P<.05$ ) and SON of H-DE-71 ( $P<.05$ ). Similarly, *Oxt* mRNA  
773 transcripts were decreased in the BNST of L-DE-71 and H-DE-71 ( $P<.05$ ) and SON of L-DE-71  
774 ( $P<.05$ ). *Oxtr* levels were increased in PVN of L-DE-71 ( $P<.05$ ) and the BNST and amygdala of  
775 H-DE-71 ( $P<.05$ ). For *Avplar*, BNST levels were upregulated in L-DE-71 ( $P<.05$ ) and  
776 downregulated in SON in H-DE-71 ( $P<.05$ ). No changes in *Adcyap1* or *Adcyap1r1* were observed.

777

### 778 *DE-71 alters plasma vasopressin but not oxytocin levels in F1 offspring*

779 We next measured plasma oxytocin and vasopressin concentrations and their association  
780 with social behavior phenotypes. Figure 9 shows that plasma AVP levels in L-DE-71 F1 females  
781 were significantly elevated relative to VEH/CON ( $P<.05$ ). In contrast, there were no group  
782 differences in plasma OXT levels.

783

## 784 **Discussion**

785 Growing evidence suggests a positive association between early-life exposure to PBDEs  
786 and neurodevelopmental alterations<sup>97</sup>. Environmental factors, including xenobiotic chemical  
787 exposures, may provide a plausible explanation for the rising incidence of NDDs with social  
788 deficits<sup>4</sup>, however, experimental evidence has not established a direct link with specific candidate  
789 chemicals. With this purpose, our study is the first to investigate the effects of the penta-PBDE  
790 mixture DE-71 on behaviors and neurochemical/endocrine profiles relevant to several core ASD  
791 symptom domains. Our experimental design exposes progeny to the full complement of congeners  
792 found in human breast milk<sup>98</sup>. The major findings reveal that developmental DE-71 exposure  
793 produces enduring deficits in social recognition, repetitive behavior and social odor discrimination  
794 in female offspring. The behavioral phenotypes occurred concomitantly with changes in peripheral  
795 AVP and in the neuromolecular phenotype of *Oxt* and/or *Avp* signaling pathways in brain regions  
796 that coordinate complex social behaviors. Together, the behavioral, sensory and neurochemical  
797 phenotypes produced by DE-71 may provide a novel, comprehensive ASD-relevant model with  
798 high translational impact. Our results are congruent with a disrupted developmental trajectory of  
799 the Social Processing Domain as outlined in the 2010 NIMH Research Domain Criteria (RDoC)  
800 framework<sup>1</sup>; a key characteristic of ASD pathology. Our work is further strengthened by the use  
801 of the litter as the unit of statistical analysis, thus overcoming risk of bias (RoB) of individual  
802 studies<sup>99</sup> and inter-individual variability. Further, DE-71 produced the common hormetic response,  
803 such that only 0.1 but not 0.4 mg/kg exhibited most of the behavior changes even though there  
804 was a dose-dependent increase in brain accumulation of  $\Sigma$ PBDE congeners. Moreover, confirmed  
805 the augmented susceptibility to developmental relative to adult exposure, highlighting the  
806 significance of chemical exposures during critical neurodevelopmental windows. Collectively,

807 these data support the conclusion that environmental xenobiotics impact social behavior and  
808 related neurochemical signaling pathways in mice relevant to NDDs.

809 ***Perinatal DE-71 exposure produces deficient social recognition and increases repetitive***  
810 ***behavior in adult female offspring.***

811 Our main finding was that *in utero* and lactational transfer of DE-71 produces behavioral  
812 phenotypes resembling two core behavioral features of a ASD DSM-V diagnosis: deficits in social  
813 reciprocity and communication and repetitive/stereotyped behaviors<sup>100</sup>. With respect to the latter,  
814 female offspring exposed to L-DE-71 showed increased activity on a marble burying test indicative  
815 of repetitive behaviors in rodent models of ASD<sup>79</sup>. Developmental L-DE-71 exposure also  
816 produced deficient short-term social memory (SNP) and long-term social recognition memory  
817 (SRM), while sociability (SOC) was not affected, ruling out a lack of the ‘social motivation’  
818 component of social cognition. SRM is considered to be another distinct behavioral domain and  
819 important for the ‘knowledge of self and others’ component of social cognition<sup>65</sup>.

820 Though much is still unknown about the neural correlates of social behavior, the social  
821 motivation and social recognition domains have been shown to be independent of each other. For  
822 instance, deficits in SNP can occur without decrements in sociability in other models of deficient  
823 social behavior induced by high fat diet<sup>101</sup> or C-section delivery<sup>102</sup>. The former can be restored by  
824 OXT administration. In other reports, restoring OXT content in the PVN with probiotic therapy  
825 (*L. reuteri*), in maternal high fat diet and valproic acid offspring, rescues SOC and SNP, but not  
826 other ASD endophenotypes<sup>52,53</sup>. In a maternal immune activation (MIA) model, both SNP and  
827 SOC are deficient but unable to be restored by *B. fragilis*, while repetitive behavior is rescued<sup>103</sup>.  
828 Taken together, these results suggest that different mechanisms and/or circuitry govern the various  
829 social behavior domains that can be selectively isolated by experimental contrast and susceptibility

830 to early-life PBDEs. Specifically, perinatal DE-71 exposure significantly compromises the social  
831 recognition domain of social cognition, which is more relevant to ASD since the behaviors related  
832 to knowledge of self and others such as facial recognition, empathy and evaluation of emotion of  
833 others are disrupted in ASD patients<sup>65,104</sup>.

834 Our findings indicate deficient short-term social recognition and long-term social  
835 recognition memory in L-DE-71 F1, suggesting our results may be translational to ASD and other  
836 NDDs characterized by psycho-social deficiencies. While findings of epidemiological studies  
837 evaluating associations between PBDEs and social deficits/ASD are mixed (Gibson et al, 2018;  
838 Braun et al, 2014; Vuong et al, 2016), a higher risk of poor social competence has been found with  
839 increasing postnatal exposure to BDE-47 (4 yr old child serum) (Gascon et al, 2011). BDE-47  
840 levels in cord blood have also been positively associated with poor social domain development in  
841 24 month-old toddlers<sup>35</sup>. Previous rodent studies examining the effects of environmental pollutants  
842 on social behavior have produced inconsistent results perhaps due to heterogeneity of brominated  
843 (BFR) flame retardants used, timing of exposure, sex and/or model organism used. Importantly,  
844 the only other study examining the effects of DE-71 (0.3 and 1.6 ppm) on social behavior supports  
845 our findings. Fernie and colleagues (2005) found fewer and less appropriate pair-bonding and  
846 courtship behaviors in exposed captive kestrels<sup>105</sup>. In contrast, female offspring exposed to BDE-  
847 47 perinatally via mother showed reduced sociability relative to controls<sup>46</sup> but no effect of BDE-  
848 47 (at 0.03 mg/kg) was detected on SNP unless administered to genetically altered mice lacking  
849 methyl-CPG binding protein 2 (*Mecp2*), a frontal cortical protein negatively associated with  
850 ASD<sup>106</sup>. Male CD-1 mice developmentally exposed to BDE-47 (0.2 mg/kg) display reduced time  
851 with conspecifics but show no effect on SNP relative to controls<sup>47</sup>. In rats perinatally exposed to

852 PBDE-47 (50 mg/kg) Li and others (2021) report preference for stranger over familiar conspecific  
853 and for social stimulus over empty corral but with reduced time spent in exploration<sup>107</sup>.

854 Our findings are also supported by perinatal exposure studies using other BFRs such as  
855 Firemaster 550 (6.6 mg/kg/day) and its BFR and organophosphate components alone (3.3  
856 mg/kg/d), which produce deficits in social recognition after 24 h retention in a sex and exposure-  
857 specific manner in rats<sup>108</sup>. Perinatal exposure to Firemaster 550 also produces abnormal partner  
858 preference in female prairie voles (1 mg/kg)<sup>109</sup>. Using low doses of BDE-209 (0.12 ng/mouse/day,  
859 s.c.), Chen and colleagues (2019) did not observe deficient sociability nor SNP in exposed male  
860 mice offspring<sup>110</sup>. Therefore, it appears that PBDE effects on social behavior may be congener-  
861 and dose-specific.

862

863 ***Perinatal DE-71 exposure produces deficient novel object recognition memory in dams and***  
864 ***adult female offspring.***

865 A complex interplay between forebrain regions is responsible for normal social  
866 recognition<sup>67,65,66</sup> including hippocampal circuits underlying social memory formation and  
867 amygdalar circuits that process social signals such as volatile odorant pheromones that trigger  
868 social and reproductive behaviors<sup>111,112</sup>. DE-71-exposed socially deficient mice also showed  
869 abnormal NOR memory suggesting abnormal function in hippocampus since it serves as an  
870 integration hub underlying both social recognition memory and recognition memory<sup>64,114,115</sup>.  
871 Toxicological studies of developmentally administered single BDE congeners or DE-71 have not  
872 examined effects on NOR or SMR<sup>99</sup>. However, previous studies using peri/postnatally  
873 administered single BDE congeners such as BDE-153 (0.9 mg/kg bw) and -47 (0.03 mg/kg bw)  
874 have showed neurotoxic actions on hippocampal-dependent function related to spatial

875 memory<sup>113,95,99</sup>. In support of our findings, evidence from human studies suggest that more than  
876 one environmental BDE congener may produce risk for cognitive impairments in children. For  
877 example, several PBDEs found in maternal samples (BDE-47, 99, 100, 153) are associated with  
878 children's lowered IQ and cognitive scores<sup>114,115,36</sup> mental/physical development<sup>116</sup> and fine motor  
879 skills, attention and cognition<sup>22</sup>.

880         It is not surprising that L-DE-71 F1 mice showed both deficient NOR memory and SRM.  
881 However, while deficient SRM was seen at both short and long-term retention times, NOR  
882 memory deficits were evident at short-term retention time only. Moreover, F0 showed deficits only  
883 in short-term NOR memory indicating that short-term social recognition ability and short-term  
884 novel object recognition memory are distinct constructs. Therefore, PBDEs may target different  
885 brain circuits participating in general and social memory processes and/or different neurochemical  
886 systems within each circuit. For example, hippocampal OXTRs are necessary for short-term social  
887 recognition but not novel object recognition memory in male mice<sup>56</sup>.

888

### 889 *Perinatal exposure to DE-71 alters social odor discrimination in adult female offspring*

890         Recognition of conspecifics in rodents depends on proper identification, discrimination and  
891 processing of olfactory cues present in urine and secretions from skin, reproductive tract and scent  
892 glands<sup>111,112</sup>. We found that the disruption of social behavior after perinatal DE-71 exposure is  
893 coincident with abnormal profiles of olfactory habituation/dishabituation to social odors. For  
894 example, socially-deficient L-DE-71 mice also displayed a reduction in habituation to social odors  
895 and in dishabituation from one to another social odor. In H-DE-71 mice the deficits in olfactory  
896 discrimination and social behavior (reduced sociability with normal social recognition ability and  
897 memory) were relatively less severe. In combination, these results suggest that DE-71 effects on

898 olfactory discrimination are specific to social odors and that olfactory as well as social deficits are  
899 different depending on dose. An olfactory preference test of non-social odors showed no deficits  
900 in general olfactory processing. Therefore, reduced social and recognition memory produced by  
901 DE-71 is concomitant with deficient social odor discrimination. It is unclear why PBDEs are more  
902 neurotoxic to social odor processing but may depend on the different CNS pathways taken by  
903 signals from neutral and social odors. Chemosensory cues are processed through two olfactory  
904 systems; neutral odors (banana and almond) are processed through the main olfactory epithelium  
905 (MOE) and social odors through both MOE and the vomeronasal organ (VNO)<sup>92</sup>. Signals are then  
906 processed through amygdala and hypothalamus to trigger innate social and reproductive behaviors.

907         There are no previous studies on PBDEs and olfactory function although BDE-47, -85, -  
908 99 can concentrate to the epithelium of the nasal cavity<sup>117</sup> and developmental exposure to BDE-  
909 209 impairs subventricular zone (SVZ) neurogenesis and olfactory granule cell morphology in  
910 mice<sup>118</sup>. However, a recent study indicates that prenatal exposure to PCBs (Aroclor 1221, 1 mg/kg)  
911 impair mate preference behavior based on olfactory cues concomitant with impaired odor  
912 preference for mates with different hormone status in adult female offspring<sup>119</sup>. Our findings that  
913 early-life PBDE exposure alters social odor discrimination may translate to autistic humans which  
914 are prone to hypo- or hyper-reactivity to sensory stimulation (American Psychiatric Association,  
915 2013 DSM-V); recent studies suggest that this may include atypical olfaction<sup>120</sup>. Indeed, several  
916 olfactory outcomes have been reported in children with ASD, i.e., abnormal odor responses,  
917 difficulties in emotional reaction to odors, impaired detection thresholds and odor identification as  
918 well as heightened olfactory sensitivity<sup>121,122,120</sup>. Further research is needed to discern the  
919 mechanisms by which PBDEs may act to alter social odor discrimination and if this contributes to  
920 their social recognition deficits. Interestingly, extrahippocampal OXT and AVP systems, that

921 contribute to short-term social recognition, also modulate detection and processing of social  
922 odors<sup>123,124</sup>.

923

924 ***Perinatal DE-71 alters AVP and OXTergic neuromolecular phenotypes in brain regions that***  
925 ***coordinate complex social behaviors***

926 Our lab has previously shown that in vitro and early-life exposure to PBDEs (and PCBs)  
927 produce neuroendocrine disruption of the prosocial neuropeptide, vasopressin, under osmotically  
928 stimulated state<sup>59,60,63</sup>. Therefore, the observed PBDE-induced deficits in SNP and SMR may result  
929 from altered function of AVP and/or OXT neurochemical systems. Here we show that L-DE-71  
930 downregulates *Avp* in BNST, which provides sexually dimorphic AVPergic innervation to LS<sup>125</sup>.  
931 Diminished AVPergic signaling to LS may explain reduced social recognition memory in L-DE-  
932 71 F1 females, since AVP1a receptor antagonism in LS compromises social discrimination  
933 especially well in females<sup>126</sup>. DE-71-mediated upregulation in BNST *Avplar* may represent a  
934 compensatory effect. Interestingly, *Avplar* in the ventromedial nucleus (VMN) is upregulated by  
935 the PCB mixture A1221 in female rat (but not male) offspring and is not dependent on estrogenic  
936 pathways<sup>127</sup>. The observed downregulation of *Avp* in SON may also impact social recognition  
937 ability indirectly via reduced AVPergic-mediated activation of BNST<sup>128</sup>.

938 At 0.1 mg/kg, DE-71 also produced elevated plasma AVP which is consistent with less  
939 inhibitory regulation over axonal secretion of AVP hormone resulting from reduced levels of  
940 central AVP<sup>129</sup>. DE-71 can interfere with intracellular calcium dynamics and increase exocytosis  
941 in PC12 pheochromocytoma endocrine cells<sup>130</sup> and potentially increase secretion of stored AVP  
942 depots in axonal terminals located in the posterior pituitary releasing AVP into the bloodstream.  
943 DE-71 appears to alter the central OXTergic system which is also necessary for social recognition



944 and partner preference<sup>67</sup>. For example, mice with OXT gene deletion fail to remember recently  
945 encountered individuals and do not show the typical decline in preference during subsequent  
946 exposures to the familiar mouse, an effect which can be rescued by central administration of  
947 OXT<sup>131</sup>. A recent report has demonstrated that OXT receptor blockade, in the extrahypothalamic  
948 population of oxytocinergic neurons of the BNST, impairs social recognition in female and male  
949 rats<sup>132</sup>. Here we show that in the BNST, L-DE-71 female F1 display significantly reduced *Oxt*  
950 mRNA transcripts. Assuming that there is a positive correlation between gene and peptide content  
951 and release, one interpretation of our data is that L-DE-71 exposure reduces OXTergic signaling  
952 which is necessary for normal social discrimination<sup>132</sup>. Our results further indicate that BNST-  
953 originating OXT may be sufficiently important for activating BNST OXTR relative to PVN-  
954 originating OXT<sup>133</sup>. H-DE-71 F1 females display reduced BNST *Oxt* mRNA in conjunction with  
955 upregulated *Oxtr*, a likely compensatory mechanism to maintain OXT receptor signaling at normal  
956 levels. Importantly, L-DE-71 also reduced *Oxt* transcripts in the SON. Because local release of  
957 OXT from SON dendrites that extend to MeA promotes social recognition through amygdalar  
958 OXTR<sup>134,135</sup>, downregulated SON *Oxt* may underlie, in part, the associated SNP and SMR deficits.  
959 OXT in the BNST also drives stress-induced social vigilance and avoidance that may be at play in  
960 social behavior domains examined here<sup>136</sup>. Since the promoter regions for genes of both  
961 oxytocin<sup>137</sup> and vasopressin systems<sup>138</sup> are susceptible to epigenetic modification<sup>138</sup>, these genes  
962 may be altered by global DNA methylation measured after developmental BDE-47 exposure<sup>46,139</sup>.  
963 Our findings may have translational value since altered OXT and AVP mechanisms in humans  
964 have been implicated in ASD<sup>140,141,142,143</sup>.

965

966 ***Specificity and comprehensive profile of PBDE toxicant model of ASD***

967 A recent meta-review has put forth recommendations to improve ASD model  
968 characterization in rodent studies such that information about reciprocal social communication and  
969 stereotyped repetitive behavior domains are characterized in the same animals<sup>7</sup>. To this end, we  
970 used established protocols to measure ASD-relevant and other comorbid behaviors in order to fully  
971 characterize the DE-71-induced phenotypes<sup>50,144</sup>. We found that the effects of DE-71 were specific  
972 to social novelty preference and social recognition memory as well as repetitive behavior and  
973 olfactory discrimination of social odors. Alterations were specific to offspring exposed perinatally  
974 via maternal transfer of environmentally relevant BDE congeners; adult exposed mothers were  
975 mostly unaffected. DE-71 had little to no effects on behaviors representing the domains of anxiety,  
976 depression and locomotion indicating ASD-relevant specificity without general neurological  
977 effects. In addition, there were no indications of reduced general health, i.e., body weight in pups  
978 nor gross abnormalities in maternal nest conditions. We have recently reported that similarly  
979 exposed (L-DE-71) female offspring, and to a lesser degree, their exposed mothers, display  
980 diabetic symptomatology, effects which may relate to the present findings<sup>71</sup>. Importantly, we used  
981 multiple behavioral tests to validate social and other constructs studied (locomotion and anxiety).  
982 For example, for all F1 groups, the frequency of total entries on EPM and distance travelled on  
983 OFT yielded similar results on locomotion. In addition, results on time spent in open arm on EPM,  
984 and latency to leave center on Suok was consistent with duration in center of OFT.

985 Our DE-71 model of ASD also shows altered prosocial peptide  
986 neurotransmitters/neurohormones that are critical to ensuring proper development of social brain  
987 networks. In particular, the vasopressin and oxytocin systems are critically involved in social  
988 cognition with mutations having sociobehavioral impact that have been implicated in core  
989 symptoms of autism<sup>145</sup>. These neurochemical systems are being actively studied as potential

990 targets of future therapeutic interventions for ASD<sup>146,147</sup>. In light of incongruent findings reported  
991 by past rodent and human studies<sup>7</sup>, we believe that our findings brings us closer to understanding  
992 the risk of ASD posed by xenobiotic endocrine disrupting chemicals. Nevertheless, human and  
993 rodent studies reporting on the relationship between PBDE exposure and autistic phenotype are  
994 few in number or have yielded inconclusive results and this field would benefit from additional  
995 detailed epidemiological and animal studies on the relationship between persistent organic  
996 pollutants (POPs) and risk of ASD.

997

998 ***Maternal transfer of BDE congeners in DE-71 and their brain accumulation in female offspring***  
999 ***is dose- and time-dependent*** BDE congener composition found in PND15 exposed brains mimics  
1000 that found in humans. BDE-28, -47, -99, -100, -153 were common congeners found at ppb in both  
1001 DE-71-exposed offspring groups at PND15 with three-fold greater levels in H-DE-71 than L-DE-  
1002 71.  $\sum$ PBDE values for adult serum are 30–100ng/g lipid<sup>29</sup> and 3 to 9-fold higher in infants because  
1003 of exposure through breastmilk and in toddlers because of exposure through house dust and the  
1004 diet<sup>148,149,26,25</sup>. Serum  $\sum$ PBDE values can reach 482 ng/g l.w. in toddlers (California 18 month-old)  
1005 (Fischer et al., 2006) but lesser values have also been reported, i.e., 127 ng/g l.w.<sup>150</sup> in Ohio 2 year-  
1006 olds and 100 ng/g l.w. for North Carolina 12-36 month-old toddlers<sup>151</sup>. Using a divisor factor of  
1007 .095 to convert w.w. to l.w. (unpublished observations), we estimate our mean  $\sum$ PBDE in L-DE-  
1008 71 F1 at PND 15 to be 1.7- to 8.2-fold greater, suggesting ours represents a translational model of  
1009 maternal PBDE transfer. The main congeners in PND15 brains, BDE-47, -85, -99, -100, -153, and  
1010 -154, accounting for 97% of the mean  $\sum$ PBDEs, also comprise the majority of congeners (96%)  
1011 in DE-71<sup>32</sup>. These and other congeners found in offspring brain samples, i.e., BDE-17, 28, 49, 138,  
1012 139, 140, 183 and 184, have also been detected in human serum and/or breastmilk<sup>152</sup>. Importantly,

1013 to our knowledge, BDE-49, -140, -183, -184 have not been previously reported in DE-71 exposed  
1014 rodent brain<sup>32</sup>.

1015 Although using a mixture like DE-71 closely models the PBDE contamination previously  
1016 shown in human breastmilk, there are some congeners, found at low levels in breastmilk, that we  
1017 did not detect in offspring brain, i.e., BDE-7, 15, 71, 77, 119, 126<sup>152,153</sup>. Of these BDE-71 and -  
1018 126 are present in DE-71<sup>154</sup> Little or no information is available about the penetrance and/or  
1019 neuroactivity of the missing congeners. In most rodent studies, which have focused on a single  
1020 PBDE congener, BDE-47, dominantly detected in humans, have not reported pervasive effects on  
1021 social behavior as we do here using DE-71. We speculate that BDE-47 alone is not effective in  
1022 producing deficits in social recognition and memory and that, instead, several PBDE congeners  
1023 may act synergistically and/or additively to generate these abnormal phenotypes, reinforcing the  
1024 need for *in vivo* studies using PBDE formulations that mimic child exposure. By PND 110 the  
1025 BDE composition in F1 brain was limited to BDE-153, which may be partly responsible for  
1026 neurotoxicity seen. BDE-153 has been positively associated with lower IQ in children and can  
1027 cause impaired learning and memory in animal studies<sup>115,113</sup>. However, while BDE-153 (and an  
1028 additional 6 congeners) is detected at ppb in *postmortem* brain samples from 4-71 year-old born  
1029 1940 to 2000, it is significantly depleted in autistics relative to normal subjects<sup>88</sup>. The relatively  
1030 lower retention of BDE-47 is in line with a previous report of differential tissue accumulation and  
1031 disposition of BDE congeners attributed to their toxicokinetic properties<sup>155</sup>. *Cyp*-mediated  
1032 biotransformation of BDE-47 and -99 (but not 153) may contribute since these congeners contain  
1033 sites with adjacent unsubstituted carbons where the metabolism occurs<sup>156</sup>. By PND 110, most of  
1034 the congeners were eliminated from brain except for BDE-153; minimal metabolism of this  
1035 congener is observed in rodents due to its high lipophilicity as determined by a high octanol-

1036 water partition coefficient ( $\text{Log } K_{ow}$ )<sup>156</sup>. Our findings suggest that elevated brain levels of key BDE  
1037 congeners during early postnatal development may predispose children to neurobehavioral  
1038 alterations related to ASD.

### 1039 **Conclusion**

1040        Though the role of environmental toxicants in the etiology of NDDs is poorly understood,  
1041 our data support a link between maternal toxicant exposures and abnormal social and repetitive  
1042 behavior in offspring that is relevant to ASD. We have shown that early-life exposure to DE-71  
1043 leading to these phenotypes is associated with human-relevant levels and composition of BDE  
1044 congeners penetrating the postnatal offspring brain via maternal transfer. DE-71 actions almost  
1045 exclusively affect F1 progeny, supporting previous studies showing the particular susceptibility of  
1046 developing nervous system to neurotoxic actions of PBDEs. These abnormal social behavior  
1047 phenotypes are specific to social novelty preference and social recognition memory and are also  
1048 associated with excessive repetitive behavior, as well as neurochemical and social odor processing  
1049 correlates – suggesting that discrete brain systems are targeted by PBDEs to promote  
1050 neurodevelopmental abnormalities.. Future studies are needed to discern if DE-71 actions are  
1051 sexually dimorphic and extend to exposed male offspring. We believe that our environmental  
1052 toxicant mouse model has utility in future studies examining the relationship between  
1053 environmental xenobiotics, neurodevelopmental reprogramming and the rising incidence of  
1054 NDDs.

### 1055 ***Limitations of the Study***

1056        The results of the PCR analysis provide novel results on the effects of PBDE exposure on  
1057 the expression of gene markers for small ‘prosocial’ neuropeptides and their receptors in specific

1058 regions of the social brain network. However, these restricted regions vary in cell density and limit  
1059 the RNA yield for genes of interest (GOIs), especially in the amygdala and LS. Moreover, relative  
1060 expression was more variable for ROIs that have low expression of GOIs, i.e., *Oxt* for LS. To  
1061 improve our experimental data, we followed MIQE guidelines to optimize oligonucleotide primer  
1062 efficiency and target specificity. Since the methodological approach we outlined depends on the  
1063 level and variability of gene expression and quantity of RNA collected, our results should be  
1064 interpreted alongside these limitations. BDE congener analysis was performed using two mass  
1065 spectrometry methods utilized by teams at different institutions. The GC/ECNI-MS method uses  
1066 an ECNI ionization mode to improve sensitivity. This method provides equal sensitivity to  
1067 HRGC/HRMS that uses electron impact ionization. Therefore, the reduction in brain BDE  
1068 congener at PND110 is likely due to elimination and not to methodological factors. All social  
1069 behavioral tests were analyzed using litter as the unit of statistical analysis. However, for practical  
1070 reasons most others tests used individual subjects. Our findings pertain to exposed female  
1071 offspring and their mothers but male offspring were omitted due to limited resources. Further  
1072 research is needed to determine if the ASD phenotypes evoked using the PBDE model are sex-  
1073 specific.

1074

## 1075 **Acknowledgements**

1076 We acknowledge Drs. G. Hicks, M. Collin, D. Carter and C. and H. Clark at UCR Institute  
1077 for Integrative Genome Biology, Genomics and Imaging Cores, and E. Grace (IDT) and M. Kuhn  
1078 (NEB) for advice on PCR analysis. We thank UCR graduate students R. Bottom, K. Conner and  
1079 D. Rohac for assistance with Suok and FST. We thank Drs. K. Huffman (Dept. Psychology), W.  
1080 Saltzman (Dept. Biology) for access to behavioral apparatus. We are grateful to Dr. B. Wong

1081 (Noldus) for Ethovision software training. Dr. J. Porter and M. Colon at the Brain Behavioral Core  
1082 (RR003050/MD007579), Ponce Health Sciences University, provided additional support on  
1083 Ethovision data analysis. We thank B. O’Hara and R. Hart (Arbor Assays) for advice on EIA  
1084 analysis and Dr. M. Adams for the use of speed vacuum evaporator. We thank J. Phan for help  
1085 with animal husbandry. We thank Jim from GraphPad Support for helpful software assistance. We  
1086 are grateful to Drs. I. Ethell, F. Sladek, K. Huffman, M. Riccomagno for gift of mice used as  
1087 breeders and stimulus animals. Illustrations were created with BioRender.com. The authors also  
1088 thank Drs. Michael Hughes and Andrew Johnstone of USEPA for their helpful comments on an  
1089 earlier version of this manuscript.

1090

#### 1091 **Dedication**

1092 This report is dedicated to Dr. Elizabeth R. Gillard, who set us on the path to study the  
1093 neurotoxicity of endocrine disrupting chemicals and who embodied an intense passion for  
1094 discovery. Moreover, she cultivated an inclusive culture and herculean work ethic that has  
1095 promoted the highest standards for excellence in the lab. We immortalize her memory here.

1096

#### 1097 **References**

- 1098 1. Research Domain Criteria (RDoC). [https://www.nimh.nih.gov/research/research-funded-by-](https://www.nimh.nih.gov/research/research-funded-by-nimh/rdoc/index.shtml)  
1099 [nimh/rdoc/index.shtml](https://www.nimh.nih.gov/research/research-funded-by-nimh/rdoc/index.shtml).
- 1100 2. Weigelt, S., Koldewyn, K. & Kanwisher, N. Face identity recognition in autism spectrum disorders:  
1101 a review of behavioral studies. *Neurosci. Biobehav. Rev.* **36**, 1060–1084 (2012).
- 1102 3. Ewbank, M. P. *et al.* Repetition Suppression and Memory for Faces is Reduced in Adults with  
1103 Autism Spectrum Conditions. *Cereb. Cortex* **27**, 92–103 (2017).
- 1104 4. Maenner, M. J. *et al.* Prevalence of Autism Spectrum Disorder Among Children Aged 8 Years -

- 1105 Autism and Developmental Disabilities Monitoring Network, 11 Sites, United States, 2016. *MMWR*  
1106 *Surveill. Summ.* **69**, 1–12 (2020).
- 1107 5. Kim, Y. S. *et al.* Prevalence of autism spectrum disorders in a total population sample. *Am. J.*  
1108 *Psychiatry* **168**, 904–912 (2011).
- 1109 6. Grandjean, P. & Landrigan, P. J. Neurobehavioural effects of developmental toxicity. *Lancet Neurol.*  
1110 **13**, 330–338 (2014).
- 1111 7. Pelch, K. E., Bolden, A. L. & Kwiatkowski, C. F. Environmental Chemicals and Autism: A Scoping  
1112 Review of the Human and Animal Research. *Environ. Health Perspect.* **127**, 46001 (2019).
- 1113 8. Rynkiewicz, A., Janas-Kozik, M. & Słopeń, A. Girls and women with autism. *Psychiatr. Pol.* **53**,  
1114 737–752 (2019).
- 1115 9. Werling, D. M. & Geschwind, D. H. Sex differences in autism spectrum disorders. *Curr. Opin.*  
1116 *Neurol.* **26**, 146–153 (2013).
- 1117 10. Zhang, Y. *et al.* Genetic evidence of gender difference in autism spectrum disorder supports the  
1118 female-protective effect. *Transl. Psychiatry* **10**, 4 (2020).
- 1119 11. Terasaki, L. S., Gomez, J. & Schwarz, J. M. An examination of sex differences in the effects of  
1120 early-life opiate and alcohol exposure. *Philos. Trans. R. Soc. Lond. B Biol. Sci.* **371**, 20150123  
1121 (2016).
- 1122 12. Kozlova, E. V. *et al.* Maternal transfer of environmentally relevant polybrominated diphenyl ethers  
1123 (PBDEs) produces a diabetic phenotype and disrupts glucoregulatory hormones and hepatic  
1124 endocannabinoids in adult mouse female offspring. *Sci. Rep.* **10**, 18102 (2020).
- 1125 13. Ionas, A. C. *et al.* Children’s exposure to polybrominated diphenyl ethers (PBDEs) through  
1126 mouthing toys. *Environ. Int.* **87**, 101–107 (2016).
- 1127 14. Stapleton, H. M., Dodder, N. G., Offenber, J. H., Schantz, M. M. & Wise, S. A. Polybrominated  
1128 diphenyl ethers in house dust and clothes dryer lint. *Environ. Sci. Technol.* **39**, 925–931 (2005).
- 1129 15. Drage, D. S. *et al.* Serum measures of hexabromocyclododecane (HBCDD) and polybrominated  
1130 diphenyl ethers (PBDEs) in reproductive-aged women in the United Kingdom. *Environ. Res.* **177**,



- 1131 108631 (2019).
- 1132 16. Guo, W. *et al.* PBDE levels in breast milk are decreasing in California. *Chemosphere* **150**, 505–513  
1133 (2016).
- 1134 17. Ohajinwa, C. M. *et al.* Hydrophobic Organic Pollutants in Soils and Dusts at Electronic Waste  
1135 Recycling Sites: Occurrence and Possible Impacts of Polybrominated Diphenyl Ethers. *Int. J.*  
1136 *Environ. Res. Public Health* **16**, (2019).
- 1137 18. Abbasi, G., Li, L. & Breivik, K. Global Historical Stocks and Emissions of PBDEs. *Environ. Sci.*  
1138 *Technol.* **53**, 6330–6340 (2019).
- 1139 19. Terry, P. *et al.* Polybrominated diphenyl ethers (flame retardants) in mother-infant pairs in the  
1140 Southeastern U.S. *Int. J. Environ. Health Res.* **27**, 205–214 (2017).
- 1141 20. Hurley, S. *et al.* Temporal Evaluation of Polybrominated Diphenyl Ether (PBDE) Serum Levels in  
1142 Middle-Aged and Older California Women, 2011-2015. *Environ. Sci. Technol.* **51**, 4697–4704  
1143 (2017).
- 1144 21. Lyche, J. L., Rosseland, C., Berge, G. & Polder, A. Human health risk associated with brominated  
1145 flame-retardants (BFRs). *Environ. Int.* **74**, 170–180 (2015).
- 1146 22. Chen, Z.-J. *et al.* Polybrominated diphenyl ethers (PBDEs) in human samples of mother-newborn  
1147 pairs in South China and their placental transfer characteristics. *Environ. Int.* **73**, 77–84 (2014).
- 1148 23. Darrow, L. A. *et al.* Predictors of Serum Polybrominated Diphenyl Ether (PBDE) Concentrations  
1149 among Children Aged 1–5 Years. *Environ. Sci. Technol.* **51**, 645–654 (2017).
- 1150 24. Costa, L. G., de Laat, R., Tagliaferri, S. & Pellacani, C. A mechanistic view of polybrominated  
1151 diphenyl ether (PBDE) developmental neurotoxicity. *Toxicol. Lett.* **230**, 282–294 (2014).
- 1152 25. Rose, M. *et al.* PBDEs in 2-5 year-old children from California and associations with diet and indoor  
1153 environment. *Environ. Sci. Technol.* **44**, 2648–2653 (2010).
- 1154 26. Toms, L.-M. L. *et al.* Higher accumulation of polybrominated diphenyl ethers in infants than in  
1155 adults. *Environ. Sci. Technol.* **42**, 7510–7515 (2008).
- 1156 27. Stapleton, H. M. *et al.* Alternate and new brominated flame retardants detected in US house dust.

- 1157 *Environ. Sci. Technol.* **42**, 6910–6916 (2008).
- 1158 28. Johnson-Restrepo, B. & Kannan, K. An assessment of sources and pathways of human exposure to  
1159 polybrominated diphenyl ethers in the United States. *Chemosphere* **76**, 542–548 (2009).
- 1160 29. Costa, L. G. & Giordano, G. Developmental neurotoxicity of polybrominated diphenyl ether (PBDE)  
1161 flame retardants. *Neurotoxicology* **28**, 1047–1067 (2007).
- 1162 30. Darnerud, P. O. Brominated flame retardants as possible endocrine disrupters. *Int. J. Androl.* **31**,  
1163 152–160 (2008).
- 1164 31. Kodavanti, P. R. S. & Curras-Collazo, M. C. Neuroendocrine actions of organohalogenes: thyroid  
1165 hormones, arginine vasopressin, and neuroplasticity. *Front. Neuroendocrinol.* **31**, 479–496 (2010).
- 1166 32. Kodavanti, P. R. S. *et al.* Developmental exposure to a commercial PBDE mixture, DE-71:  
1167 neurobehavioral, hormonal, and reproductive effects. *Toxicol. Sci.* **116**, 297–312 (2010).
- 1168 33. Dingemans, M. M. L., van den Berg, M. & Westerink, R. H. S. Neurotoxicity of brominated flame  
1169 retardants: (in)direct effects of parent and hydroxylated polybrominated diphenyl ethers on the  
1170 (developing) nervous system. *Environ. Health Perspect.* **119**, 900–907 (2011).
- 1171 34. Roze, E. *et al.* Prenatal exposure to organohalogenes, including brominated flame retardants,  
1172 influences motor, cognitive, and behavioral performance at school age. *Environ. Health Perspect.*  
1173 **117**, 1953–1958 (2009).
- 1174 35. Ding, G. *et al.* Association between prenatal exposure to polybrominated diphenyl ethers and young  
1175 children’s neurodevelopment in China. *Environ. Res.* **142**, 104–111 (2015).
- 1176 36. Herbstman, J. B. *et al.* Prenatal exposure to PBDEs and neurodevelopment. *Environ. Health*  
1177 *Perspect.* **118**, 712–719 (2010).
- 1178 37. Hoffman, K., Adgent, M., Goldman, B. D., Sjödin, A. & Daniels, J. L. Lactational exposure to  
1179 polybrominated diphenyl ethers and its relation to social and emotional development among  
1180 toddlers. *Environ. Health Perspect.* **120**, 1438–1442 (2012).
- 1181 38. Vuong, A. M. *et al.* Exposure to polybrominated diphenyl ethers (PBDEs) and child behavior:  
1182 Current findings and future directions. *Horm. Behav.* **101**, 94–104 (2018).

- 1183 39. Lipscomb, S. T. *et al.* Cross-sectional study of social behaviors in preschool children and exposure  
1184 to flame retardants. *Environ. Health* **16**, 23 (2017).
- 1185 40. Adgent, M. A., Hoffman, K., Goldman, B. D., Sjödin, A. & Daniels, J. L. Brominated flame  
1186 retardants in breast milk and behavioural and cognitive development at 36 months. *Paediatr.*  
1187 *Perinat. Epidemiol.* **28**, 48–57 (2014).
- 1188 41. Braun, J. M. *et al.* Gestational exposure to endocrine-disrupting chemicals and reciprocal social,  
1189 repetitive, and stereotypic behaviors in 4- and 5-year-old children: the HOME study. *Environ. Health*  
1190 *Perspect.* **122**, 513–520 (2014).
- 1191 42. Gascon, M. *et al.* Effects of pre and postnatal exposure to low levels of polybromodiphenyl ethers on  
1192 neurodevelopment and thyroid hormone levels at 4 years of age. *Environ. Int.* **37**, 605–611 (2011).
- 1193 43. Messer, A. Mini-review: polybrominated diphenyl ether (PBDE) flame retardants as potential autism  
1194 risk factors. *Physiol. Behav.* **100**, 245–249 (2010).
- 1195 44. Gibson, E. A., Siegel, E. L., Eniola, F., Herbstman, J. B. & Factor-Litvak, P. Effects of  
1196 Polybrominated Diphenyl Ethers on Child Cognitive, Behavioral, and Motor Development. *Int. J.*  
1197 *Environ. Res. Public Health* **15**, (2018).
- 1198 45. Pinson, A., Bourguignon, J. P. & Parent, A. S. Exposure to endocrine disrupting chemicals and  
1199 neurodevelopmental alterations. *Andrology* **4**, 706–722 (2016).
- 1200 46. Woods, R. *et al.* Long-lived epigenetic interactions between perinatal PBDE exposure and  
1201 Mecp2308 mutation. *Hum. Mol. Genet.* **21**, 2399–2411 (2012).
- 1202 47. Kim, B., Colon, E., Chawla, S., Vandenberg, L. N. & Suvorov, A. Endocrine disruptors alter social  
1203 behaviors and indirectly influence social hierarchies via changes in body weight. *Environ. Health* **14**,  
1204 64 (2015).
- 1205 48. Brennan, P. A. & Kendrick, K. M. Mammalian social odours: attraction and individual recognition.  
1206 *Philos. Trans. R. Soc. Lond. B Biol. Sci.* **361**, 2061–2078 (2006).
- 1207 49. Young, L. J., Pitkow, L. J. & Ferguson, J. N. Neuropeptides and social behavior: animal models  
1208 relevant to autism. *Mol. Psychiatry* **7 Suppl 2**, S38–9 (2002).

- 1209 50. Moy, S. S. *et al.* Sociability and preference for social novelty in five inbred strains: an approach to  
1210 assess autistic-like behavior in mice. *Genes Brain Behav.* **3**, 287–302 (2004).
- 1211 51. Silverman, J. L., Yang, M., Lord, C. & Crawley, J. N. Behavioural phenotyping assays for mouse  
1212 models of autism. *Nat. Rev. Neurosci.* **11**, 490–502 (2010).
- 1213 52. Sgritta, M. *et al.* Mechanisms Underlying Microbial-Mediated Changes in Social Behavior in Mouse  
1214 Models of Autism Spectrum Disorder. *Neuron* **101**, 246–259.e6 (2019).
- 1215 53. Buffington, S. A. *et al.* Microbial Reconstitution Reverses Maternal Diet-Induced Social and  
1216 Synaptic Deficits in Offspring. *Cell* **165**, 1762–1775 (2016).
- 1217 54. Landgraf, R. & Neumann, I. D. Vasopressin and oxytocin release within the brain: a dynamic  
1218 concept of multiple and variable modes of neuropeptide communication. *Front. Neuroendocrinol.*  
1219 **25**, 150–176 (2004).
- 1220 55. Ferguson, J. N., Aldag, J. M., Insel, T. R. & Young, L. J. Oxytocin in the medial amygdala is  
1221 essential for social recognition in the mouse. *J. Neurosci.* **21**, 8278–8285 (2001).
- 1222 56. Raam, T., McAvoy, K. M., Besnard, A., Veenema, A. H. & Sahay, A. Hippocampal oxytocin  
1223 receptors are necessary for discrimination of social stimuli. *Nat. Commun.* **8**, 2001 (2017).
- 1224 57. Bielsky, I. F., Hu, S.-B., Szegda, K. L., Westphal, H. & Young, L. J. Profound impairment in social  
1225 recognition and reduction in anxiety-like behavior in vasopressin V1a receptor knockout mice.  
1226 *Neuropsychopharmacology* **29**, 483–493 (2004).
- 1227 58. Ferretti, V. *et al.* Oxytocin Signaling in the Central Amygdala Modulates Emotion Discrimination in  
1228 Mice. *Curr. Biol.* **29**, 1938–1953.e6 (2019).
- 1229 59. Coburn, C. G., Gillard, E. R. & Currás-Collazo, M. C. Dietary exposure to aroclor 1254 alters  
1230 central and peripheral vasopressin release in response to dehydration in the rat. *Toxicol. Sci.* **84**, 149–  
1231 156 (2005).
- 1232 60. Coburn, C. G., Currás-Collazo, M. C. & Kodavanti, P. R. S. Polybrominated diphenyl ethers and  
1233 ortho-substituted polychlorinated biphenyls as neuroendocrine disruptors of vasopressin release:  
1234 effects during physiological activation in vitro and structure-activity relationships. *Toxicol. Sci.* **98**,

- 1235 178–186 (2007).
- 1236 61. Currás-Collazo, M. C. Nitric oxide signaling as a common target of organohalogen and other  
1237 neuroendocrine disruptors. *J. Toxicol. Environ. Health B Crit. Rev.* **14**, 495–536 (2011).
- 1238 62. Coburn, C. G. *et al.* Permanently compromised NADPH-diaphorase activity within the osmotically  
1239 activated supraoptic nucleus after in utero but not adult exposure to Aroclor 1254. *Neurotoxicology*  
1240 **47**, 37–46 (2015).
- 1241 63. Mucio-Ramírez, S. *et al.* Perinatal exposure to organohalogen pollutants decreases vasopressin  
1242 content and its mRNA expression in magnocellular neuroendocrine cells activated by osmotic stress  
1243 in adult rats. *Toxicol. Appl. Pharmacol.* **329**, 173–189 (2017).
- 1244 64. Alvarez-Gonzalez, M. Y. *et al.* Perinatal exposure to octabromodiphenyl ether mixture, DE-79, alters  
1245 the vasopressinergic system in adult rats. *Toxicol. Appl. Pharmacol.* **391**, 114914 (2020).
- 1246 65. Bicks, L. K. *et al.* Prefrontal parvalbumin interneurons require juvenile social experience to establish  
1247 adult social behavior. *Nat. Commun.* **11**, 1003 (2020).
- 1248 66. Tanimizu, T. *et al.* Functional Connectivity of Multiple Brain Regions Required for the  
1249 Consolidation of Social Recognition Memory. *J. Neurosci.* **37**, 4103–4116 (2017).
- 1250 67. Ferguson, J. N. *et al.* Social amnesia in mice lacking the oxytocin gene. *Nat. Genet.* **25**, 284–288  
1251 (2000).
- 1252 68. Kozlova, E. V., Carrillo, V., Stapleton, H. & Currás-Collazo, M. C. Neurotoxic effects of  
1253 developmental exposure to DE-71 on forebrain social peptides, social behavior and olfaction in  
1254 c57bl/6 mice. <http://dioxin20xx.org/wp-content/uploads/pdfs/2019/1057.pdf>.
- 1255 69. Wang, D. *et al.* In utero and lactational exposure to BDE-47 promotes obesity development in mouse  
1256 offspring fed a high-fat diet: impaired lipid metabolism and intestinal dysbiosis. *Arch. Toxicol.* **92**,  
1257 1847–1860 (2018).
- 1258 70. Darnerud, P. O. *et al.* Time trends of polybrominated diphenylether (PBDE) congeners in serum of  
1259 Swedish mothers and comparisons to breast milk data. *Environ. Res.* **138**, 352–360 (2015).
- 1260 71. Kozlova, E. V. *et al.* Maternal Transfer of Environmentally Relevant Polybrominated Diphenyl

- 1261 Ethers (PBDEs) Produces a Diabetic Phenotype and Disrupts Glucoregulatory Hormones and  
1262 Hepatic Endocannabinoids in Adult Mouse Female Offspring. *bioRxiv* (2020).
- 1263 72. Schecter, A. *et al.* Polybrominated diphenyl ether (PBDE) levels in livers of U.S. human fetuses and  
1264 newborns. *J. Toxicol. Environ. Health A* **70**, 1–6 (2007).
- 1265 73. Chao, H.-R., Tsou, T.-C., Huang, H.-L. & Chang-Chien, G.-P. Levels of breast milk PBDEs from  
1266 southern Taiwan and their potential impact on neurodevelopment. *Pediatr. Res.* **70**, 596–600 (2011).
- 1267 74. Suvorov, A. & Vandenberg, L. N. To Cull or Not To Cull? Considerations for Studies of Endocrine-  
1268 Disrupting Chemicals. *Endocrinology* **157**, 2586–2594 (2016).
- 1269 75. Hess, S. E. *et al.* Home improvement: C57BL/6J mice given more naturalistic nesting materials  
1270 build better nests. *J. Am. Assoc. Lab. Anim. Sci.* **47**, 25–31 (2008).
- 1271 76. Li, Z.-M. *et al.* Placental distribution of endogenous and exogenous substances: A pilot study  
1272 utilizing cryo-sampled specimen off delivery room. *Placenta* **100**, 45–53 (2020).
- 1273 77. Friard, O. & Gamba, M. BORIS: a free, versatile open-source event-logging software for  
1274 video/audio coding and live observations. *Methods Ecol. Evol.* **7**, 1325–1330 (2016).
- 1275 78. Yang, M., Silverman, J. L. & Crawley, J. N. Automated three-chambered social approach task for  
1276 mice. *Curr. Protoc. Neurosci.* **Chapter 8**, Unit 8.26 (2011).
- 1277 79. Angoa-Pérez, M., Kane, M. J., Briggs, D. I., Francescutti, D. M. & Kuhn, D. M. Marble burying and  
1278 nestlet shredding as tests of repetitive, compulsive-like behaviors in mice. *J. Vis. Exp.* 50978 (2013)  
1279 doi:10.3791/50978.
- 1280 80. Kobayakawa, K. *et al.* Innate versus learned odour processing in the mouse olfactory bulb. *Nature*  
1281 **450**, 503–508 (2007).
- 1282 81. Murai, T., Okuda, S., Tanaka, T. & Ohta, H. Characteristics of object location memory in mice:  
1283 Behavioral and pharmacological studies. *Physiol. Behav.* **90**, 116–124 (2007).
- 1284 82. Kalueff, A. V. *et al.* The regular and light–dark Suok tests of anxiety and sensorimotor integration:  
1285 utility for behavioral characterization in laboratory rodents. *Nat. Protoc.* **3**, 129–136 (2008).
- 1286 83. Hall, C. S. Emotional behavior in the rat. I. Defecation and urination as measures of individual

- 1287 differences in emotionality. *J. Comp. Psychol.* **18**, 385–403 (1934).
- 1288 84. Palkovits, M. Isolated removal of hypothalamic or other brain nuclei of the rat. *Brain Res.* **59**, 449–  
1289 450 (1973).
- 1290 85. Bustin, S. A. *et al.* The MIQE guidelines: minimum information for publication of quantitative real-  
1291 time PCR experiments. *Clin. Chem.* **55**, 611–622 (2009).
- 1292 86. Deol, P. *et al.* Dysregulation of Hypothalamic Gene Expression and the Oxytocinergic System by  
1293 Soybean Oil Diets in Male Mice. *Endocrinology* **161**, (2020).
- 1294 87. Abu-Arafeh, A., Jordan, H. & Drummond, G. Reporting of method comparison studies: a review of  
1295 advice, an assessment of current practice, and specific suggestions for future reports. *Br. J. Anaesth.*  
1296 **117**, 569–575 (2016).
- 1297 88. Mitchell, M. M. *et al.* Levels of select PCB and PBDE congeners in human postmortem brain reveal  
1298 possible environmental involvement in 15q11-q13 duplication autism spectrum disorder. *Environ.*  
1299 *Mol. Mutagen.* **53**, 589–598 (2012).
- 1300 89. Fairless, A. H., Shah, R. Y., Guthrie, A. J., Li, H. & Brodtkin, E. S. Deconstructing sociability, an  
1301 autism-relevant phenotype, in mouse models. *Anat. Rec.* **294**, 1713–1725 (2011).
- 1302 90. Luo, M., Fee, M. S. & Katz, L. C. Encoding pheromonal signals in the accessory olfactory bulb of  
1303 behaving mice. *Science* **299**, 1196–1201 (2003).
- 1304 91. Thomas, A. *et al.* Marble burying reflects a repetitive and perseverative behavior more than novelty-  
1305 induced anxiety. *Psychopharmacology* **204**, 361–373 (2009).
- 1306 92. Huckins, L. M., Logan, D. W. & Sánchez-Andrade, G. Olfaction and olfactory-mediated behaviour  
1307 in psychiatric disease models. *Cell Tissue Res.* **354**, 69–80 (2013).
- 1308 93. Viberg, H., Fredriksson, A. & Eriksson, P. Investigations of strain and/or gender differences in  
1309 developmental neurotoxic effects of polybrominated diphenyl ethers in mice. *Toxicol. Sci.* **81**, 344–  
1310 353 (2004).
- 1311 94. Ta, T. A. *et al.* Bioaccumulation and behavioral effects of 2,2',4,4'-tetrabromodiphenyl ether (BDE-  
1312 47) in perinatally exposed mice. *Neurotoxicol. Teratol.* **33**, 393–404 (2011).



- 1313 95. Koenig, C. M., Lango, J., Pessah, I. N. & Berman, R. F. Maternal transfer of BDE-47 to offspring  
1314 and neurobehavioral development in C57BL/6J mice. *Neurotoxicol. Teratol.* **34**, 571–580 (2012).
- 1315 96. Branchi, I., Alleva, E. & Costa, L. G. Effects of perinatal exposure to a polybrominated diphenyl  
1316 ether (PBDE 99) on mouse neurobehavioural development. *Neurotoxicology* **23**, 375–384 (2002).
- 1317 97. Branchi, I., Capone, F., Alleva, E. & Costa, L. G. Polybrominated diphenyl ethers: neurobehavioral  
1318 effects following developmental exposure. *Neurotoxicology* **24**, 449–462 (2003).
- 1319 98. Lind, Y. *et al.* Polybrominated diphenyl ethers in breast milk from Uppsala County, Sweden.  
1320 *Environ. Res.* **93**, 186–194 (2003).
- 1321 99. Dorman, D. C. *et al.* Polybrominated diphenyl ether (PBDE) neurotoxicity: a systematic review and  
1322 meta-analysis of animal evidence. *J. Toxicol. Environ. Health B Crit. Rev.* **21**, 269–289 (2018).
- 1323 100. American Psychiatric Association. *Diagnostic and Statistical Manual of Mental Disorders (DSM-*  
1324 *5®)*. (American Psychiatric Pub, 2013).
- 1325 101. Hayashi, R. *et al.* Oxytocin Ameliorates Impaired Behaviors of High Fat Diet-Induced Obese Mice.  
1326 *Front. Endocrinol.* **11**, 379 (2020).
- 1327 102. Morais, L. H. *et al.* Enduring Behavioral Effects Induced by Birth by Caesarean Section in the  
1328 Mouse. *Curr. Biol.* **30**, 3761–3774.e6 (2020).
- 1329 103. Hsiao, E. Y. *et al.* Microbiota modulate behavioral and physiological abnormalities associated with  
1330 neurodevelopmental disorders. *Cell* **155**, 1451–1463 (2013).
- 1331 104. Bradshaw, J., Shic, F. & Chawarska, K. Brief report: face-specific recognition deficits in young  
1332 children with autism spectrum disorders. *J. Autism Dev. Disord.* **41**, 1429–1435 (2011).
- 1333 105. Fernie, K. J. *et al.* Exposure to polybrominated diphenyl ethers (PBDEs): changes in thyroid, vitamin  
1334 A, glutathione homeostasis, and oxidative stress in American kestrels (*Falco sparverius*). *Toxicol.*  
1335 *Sci.* **88**, 375–383 (2005).
- 1336 106. Nagarajan, R. P., Hogart, A. R., Gwyne, Y., Martin, M. R. & LaSalle, J. M. Reduced MeCP2  
1337 expression is frequent in autism frontal cortex and correlates with aberrant MECP2 promoter  
1338 methylation. *Epigenetics* **1**, e1–11 (2006).



- 1339 107. Li, Z. *et al.* Perinatal exposure to BDE-47 exacerbated autistic-like behaviors and impairments of  
1340 dendritic development in a valproic acid-induced rat model of autism. *Ecotoxicol. Environ. Saf.* **212**,  
1341 112000 (2021).
- 1342 108. Witchey, S. K., Al Samara, L., Horman, B. M., Stapleton, H. M. & Patisaul, H. B. Perinatal exposure  
1343 to FireMaster® 550 (FM550), brominated or organophosphate flame retardants produces sex and  
1344 compound specific effects on adult Wistar rat socioemotional behavior. *Horm. Behav.* **126**, 104853  
1345 (2020).
- 1346 109. Gillera, S. E. A. *et al.* Sex-specific effects of perinatal FireMaster® 550 (FM 550) exposure on  
1347 socioemotional behavior in prairie voles. *Neurotoxicol. Teratol.* **79**, 106840 (2020).
- 1348 110. Chen, Y. *et al.* Maternal exposure to low dose BDE209 and Pb mixture induced neurobehavioral  
1349 anomalies in C57BL/6 male offspring. *Toxicology* **418**, 70–80 (2019).
- 1350 111. Kogan, J. H., Franklandand, P. W. & Silva, A. J. Long-term memory underlying hippocampus-  
1351 dependent social recognition in mice. *Hippocampus* **10**, 47–56 (2000).
- 1352 112. Noack, J. *et al.* Different importance of the volatile and non-volatile fractions of an olfactory  
1353 signature for individual social recognition in rats versus mice and short-term versus long-term  
1354 memory. *Neurobiol. Learn. Mem.* **94**, 568–575 (2010).
- 1355 113. Viberg, H., Fredriksson, A. & Eriksson, P. Neonatal exposure to polybrominated diphenyl ether  
1356 (PBDE 153) disrupts spontaneous behaviour, impairs learning and memory, and decreases  
1357 hippocampal cholinergic receptors in adult mice. *Toxicol. Appl. Pharmacol.* **192**, 95–106 (2003).
- 1358 114. Lam, J. *et al.* Developmental PBDE Exposure and IQ/ADHD in Childhood: A Systematic Review  
1359 and Meta-analysis. *Environ. Health Perspect.* **125**, 086001 (2017).
- 1360 115. Azar, N. *et al.* Prenatal exposure to polybrominated diphenyl ethers (PBDEs) and cognitive ability in  
1361 early childhood. *Environ. Int.* **146**, 106296 (2021).
- 1362 116. Eskenazi, B., Chevrier, J. & Rauch, S. A. In Utero and Childhood Polybrominated Diphenyl Ether  
1363 (PBDE) Exposures and Neurodevelopment in the CHAMACOS Study. *Environmentalist* (2013).
- 1364 117. Darnerud, P. O. & Risberg, S. Tissue localisation of tetra- and pentabromodiphenyl ether congeners

- 1365 (BDE-47, -85 and -99) in perinatal and adult C57BL mice. *Chemosphere* **62**, 485–493 (2006).
- 1366 118. Xu, M. *et al.* Developmental exposure of decabromodiphenyl ether impairs subventricular zone  
1367 neurogenesis and morphology of granule cells in mouse olfactory bulb. *Arch. Toxicol.* **92**, 529–539  
1368 (2018).
- 1369 119. Hernandez Scudder, M. E., Weinberg, A., Thompson, L., Crews, D. & Gore, A. C. Prenatal EDCs  
1370 Impair Mate and Odor Preference and Activation of the VMN in Male and Female Rats.  
1371 *Endocrinology* **161**, (2020).
- 1372 120. Martin, G. N. & Daniel, N. Autism spectrum disorders and chemoreception: dead-end or fruitful  
1373 avenue of inquiry? *Front. Psychol.* **5**, 42 (2014).
- 1374 121. Rogers, S. J., Hepburn, S. & Wehner, E. Parent reports of sensory symptoms in toddlers with autism  
1375 and those with other developmental disorders. *J. Autism Dev. Disord.* **33**, 631–642 (2003).
- 1376 122. Legiša, J., Messinger, D. S., Kermol, E. & Marlier, L. Emotional responses to odors in children with  
1377 high-functioning autism: autonomic arousal, facial behavior and self-report. *J. Autism Dev. Disord.*  
1378 **43**, 869–879 (2013).
- 1379 123. Wacker, D. W. & Ludwig, M. Vasopressin, oxytocin, and social odor recognition. *Horm. Behav.* **61**,  
1380 259–265 (2012).
- 1381 124. Oettl, L.-L. *et al.* Oxytocin Enhances Social Recognition by Modulating Cortical Control of Early  
1382 Olfactory Processing. *Neuron* **90**, 609–621 (2016).
- 1383 125. Bychowski, M. E., Mena, J. D. & Auger, C. J. Vasopressin infusion into the lateral septum of adult  
1384 male rats rescues progesterone-induced impairment in social recognition. *Neuroscience* **246**, 52–58  
1385 (2013).
- 1386 126. Veenema, A. H., Bredewold, R. & De Vries, G. J. Vasopressin regulates social recognition in  
1387 juvenile and adult rats of both sexes, but in sex- and age-specific ways. *Horm. Behav.* **61**, 50–56  
1388 (2012).
- 1389 127. Topper, V. Y. *et al.* Social and neuromolecular phenotypes are programmed by prenatal exposures to  
1390 endocrine-disrupting chemicals. *Mol. Cell. Endocrinol.* **479**, 133–146 (2019).

- 1391 128. Lukas, M., Bredewold, R., Landgraf, R., Neumann, I. D. & Veenema, A. H. Early life stress impairs  
1392 social recognition due to a blunted response of vasopressin release within the septum of adult male  
1393 rats. *Psychoneuroendocrinology* **36**, 843–853 (2011).
- 1394 129. Ludwig, M., Apps, D., Menzies, J., Patel, J. C. & Rice, M. E. Dendritic Release of  
1395 Neurotransmitters. *Compr. Physiol.* **7**, 235–252 (2016).
- 1396 130. Dingemans, M. M. L. *et al.* Hydroxylation increases the neurotoxic potential of BDE-47 to affect  
1397 exocytosis and calcium homeostasis in PC12 cells. *Environ. Health Perspect.* **116**, 637–643 (2008).
- 1398 131. Dluzen, D. E., Muraoka, S., Engelmann, M. & Landgraf, R. The effects of infusion of arginine  
1399 vasopressin, oxytocin, or their antagonists into the olfactory bulb upon social recognition responses  
1400 in male rats. *Peptides* **19**, 999–1005 (1998).
- 1401 132. Dumais, K. M., Alonso, A. G., Immormino, M. A., Bredewold, R. & Veenema, A. H. Involvement  
1402 of the oxytocin system in the bed nucleus of the stria terminalis in the sex-specific regulation of  
1403 social recognition. *Psychoneuroendocrinology* **64**, 79–88 (2016).
- 1404 133. Knobloch, H. S. *et al.* Evoked axonal oxytocin release in the central amygdala attenuates fear  
1405 response. *Neuron* **73**, 553–566 (2012).
- 1406 134. Takayanagi, Y. *et al.* Activation of Supraoptic Oxytocin Neurons by Secretin Facilitates Social  
1407 Recognition. *Biol. Psychiatry* **81**, 243–251 (2017).
- 1408 135. Abramova, O. *et al.* The role of oxytocin and vasopressin dysfunction in cognitive impairment and  
1409 mental disorders. *Neuropeptides* **83**, 102079 (2020).
- 1410 136. Duque-Wilckens, N. *et al.* Extrahypothalamic oxytocin neurons drive stress-induced social vigilance  
1411 and avoidance. *Proc. Natl. Acad. Sci. U. S. A.* **117**, 26406–26413 (2020).
- 1412 137. Mamrut, S. *et al.* DNA methylation of specific CpG sites in the promoter region regulates the  
1413 transcription of the mouse oxytocin receptor. *PLoS One* **8**, e56869 (2013).
- 1414 138. Auger, C. J., Coss, D., Auger, A. P. & Forbes-Lorman, R. M. Epigenetic control of vasopressin  
1415 expression is maintained by steroid hormones in the adult male rat brain. *Proc. Natl. Acad. Sci. U. S.*  
1416 *A.* **108**, 4242–4247 (2011).

- 1417 139. Poston, R. G. & Saha, R. N. Epigenetic Effects of Polybrominated Diphenyl Ethers on Human  
1418 Health. *Int. J. Environ. Res. Public Health* **16**, (2019).
- 1419 140. Zhang, H.-F. *et al.* Plasma Oxytocin and Arginine-Vasopressin Levels in Children with Autism  
1420 Spectrum Disorder in China: Associations with Symptoms. *Neurosci. Bull.* **32**, 423–432 (2016).
- 1421 141. Kobylinska, L. *et al.* PLASMATIC LEVELS OF NEUROPEPTIDES, INCLUDING OXYTOCIN,  
1422 IN CHILDREN WITH AUTISM SPECTRUM DISORDER, CORRELATE WITH THE  
1423 DISORDER SEVERITY. *Acta Endocrinol.* **-5**, 16–24 (2019).
- 1424 142. Hendaus, M. A., Jomha, F. A. & Alhammadi, A. H. Vasopressin in the Amelioration of Social  
1425 Functioning in Autism Spectrum Disorder. *J. Clin. Med. Res.* **8**, (2019).
- 1426 143. Oztan, O. *et al.* Cerebrospinal fluid vasopressin and symptom severity in children with autism. *Ann.*  
1427 *Neurol.* **84**, 611–615 (2018).
- 1428 144. Crawley, J. N. Translational animal models of autism and neurodevelopmental disorders. *Dialogues*  
1429 *Clin. Neurosci.* **14**, 293–305 (2012).
- 1430 145. Frank, E. & Landgraf, R. The vasopressin system--from antidiuresis to psychopathology. *Eur. J.*  
1431 *Pharmacol.* **583**, 226–242 (2008).
- 1432 146. Meyer-Lindenberg, A., Domes, G., Kirsch, P. & Heinrichs, M. Oxytocin and vasopressin in the  
1433 human brain: social neuropeptides for translational medicine. *Nat. Rev. Neurosci.* **12**, 524–538  
1434 (2011).
- 1435 147. Bolognani, F. *et al.* A phase 2 clinical trial of a vasopressin V1a receptor antagonist shows improved  
1436 adaptive behaviors in men with autism spectrum disorder. *Sci. Transl. Med.* **11**, (2019).
- 1437 148. Schecter, A. *et al.* Polybrominated Diphenyl Ether Flame Retardants in the U.S. Population: Current  
1438 Levels, Temporal Trends, and Comparison With Dioxins, Dibenzofurans, and Polychlorinated  
1439 Biphenyls. *J. Occup. Environ. Med.* **47**, 199 (2005).
- 1440 149. Fischer, D., Hooper, K., Athanasiadou, M., Athanassiadis, I. & Bergman, A. Children show highest  
1441 levels of polybrominated diphenyl ethers in a California family of four: a case study. *Environ.*  
1442 *Health Perspect.* **114**, 1581–1584 (2006).

- 1443 150. Vuong, A. M. *et al.* Childhood polybrominated diphenyl ether (PBDE) exposure and neurobehavior  
1444 in children at 8 years. *Environ. Res.* **158**, 677–684 (2017).
- 1445 151. Stapleton, H. M., Eagle, S., Sjödin, A. & Webster, T. F. Serum PBDEs in a North Carolina toddler  
1446 cohort: associations with handwipes, house dust, and socioeconomic variables. *Environ. Health*  
1447 *Perspect.* **120**, 1049–1054 (2012).
- 1448 152. Chao, H. A. *et al.* Concentrations of polybrominated diphenyl ethers in breast milk correlated to  
1449 maternal age, education level, and occupational exposure. *J. Hazard. Mater.* **175**, 492–500 (2010).
- 1450 153. Zhao, Y., Ruan, X., Li, Y., Yan, M. & Qin, Z. Polybrominated diphenyl ethers (PBDEs) in aborted  
1451 human fetuses and placental transfer during the first trimester of pregnancy. *Environ. Sci. Technol.*  
1452 **47**, 5939–5946 (2013).
- 1453 154. La Guardia, M. J., Hale, R. C. & Harvey, E. Detailed polybrominated diphenyl ether (PBDE)  
1454 congener composition of the widely used penta-, octa-, and deca-PBDE technical flame-retardant  
1455 mixtures. *Environ. Sci. Technol.* **40**, 6247–6254 (2006).
- 1456 155. Staskal, D. F., Hakk, H., Bauer, D., Diliberto, J. J. & Birnbaum, L. S. Toxicokinetics of  
1457 polybrominated diphenyl ether congeners 47, 99, 100, and 153 in mice. *Toxicol. Sci.* **94**, 28–37  
1458 (2006).
- 1459 156. Sanders, J. M., Lebetkin, E. H., Chen, L.-J. & Burka, L. T. Disposition of 2,2',4,4',5,5'-  
1460 hexabromodiphenyl ether (BDE153) and its interaction with other polybrominated diphenyl ethers  
1461 (PBDEs) in rodents. *Xenobiotica* **36**, 824–837 (2006).

1462

1463

1464

1465

1466

1467

1468

1469

1470

1471

1472

1473

### Figure Legends

1474 **Fig. 1** Maternal dosing paradigm for DE-71 produces BDE congener penetration in female F1

1475 offspring brain. **a** Dosing and testing paradigm used for perinatal and adult exposure to DE-71.

1476 Direct exposure to DE-71 in adult dams (F0♀; solid shading), began ~3-4 weeks pre-conception

1477 and continued until pup weaning at PND 21. Indirect exposure in female offspring (F1♀; hatched

1478 shading) occurred perinatally (GD 0 to PND 21). **b** The ng/g wet wt (ww) sum concentrations of

1479 the 14 PBDE congeners ( $\sum_{14}\text{PBDE}$ ) detected at PND 15. **c** The ng/g wet wt sum concentrations of

1480 the 1 PBDE congener, BDE, 153, detected at PND 110. **d** BDE composition (% total) in DE-71

1481 and in brains of exposed female offspring obtained at PND 15 and PND 110. The 7 congeners that

1482 comprise <1% of DE-71 were displayed as 1%. **e,f** Absolute congener concentrations at PND 15

1483 and PND 110 for L- and H-DE-71. All values for VEH/CON were <MDL (not shown). \* $P<.05$ ,

1484 \*\* $P<.01$  compared to VEH/CON; ^ $P<.05$  compared to L-DE-71.  $n=3-4/\text{group}$ . GD, gestational

1485 day; PND, postnatal day

1486

1487 **Fig. 2** Early-life exposure to DE-71 produces deficits relevant to core symptoms of ASD. **a, c**

1488 Social Novelty Preference scores for dams and female offspring: unlike the F1 VEH/CON and F1

1489 H-DE-71, F1 L-DE-71 females failed to spend more time with a novel relative to a familiar

1490 conspecific stimulus. F0 dams exposed to DE-71 did not show abnormal social recognition relative

1491 to VEH/CON. **b, d** Recognition Index scores show decreased preference for novel stimulus in L-  
1492 DE-71 F1 relative to VEH/CON but not in F0. **e, f** Time spent sniffing in Sociability test. All  
1493 exposure groups spent significantly more time sniffing social stimulus indicating normal  
1494 sociability. **g, h** Chamber time scores in Sociability. All groups show significantly greater time  
1495 spent in social chamber relative to non-social except for F1 H-DE-71. **i** Marble Burying scores  
1496 showed offspring L-DE-71 buried a greater amount of marbles as compared to VEH/CON and H-  
1497 DE-71, but not in dams. **j** Nestlet Shredding was not affected in exposed F1 but was reduced in L-  
1498 DE-71 F0 relative to corresponding VEH/CON. \* $P < .05$ , \*\* $P < .01$ ; \*\*\*\* $P < .0001$  compared to  
1499 VEH/CON (b,d,i,j), familiar (a,c) or non-social chamber (e,f,g,h).  $n = 6-11$  litters/group (a-b), 19-  
1500 26 subjects/group (c-d), 6-9 litters/group (e), 8 litters/group (f), 13-33 litters/group (g), 13-24  
1501 subjects/group (h), 19-37 subjects/group for F1 and 11-16 subjects/group for F0 (i), 18-36  
1502 subjects/group for F1 and 16-19 subjects/group for F0 (j). F, familiar, N, novel; N, non-social, S,  
1503 social; N, non-social, E, empty, S, social

1504

1505 **Fig. 3** Exposure to L-DE-71 but not H-DE-71 reduces long-term social recognition memory in F1.  
1506 **a** When using a familiar stimulus the VEH/CON and H-DE-71 F1 mice displayed a significant  
1507 reduction in investigation time on Day 2 relative to Day 1, indicating normal SRM. In contrast, L-  
1508 DE-71 showed deficient scores after the 24 h retention period. **b** Corresponding Recognition Index  
1509 (RI), indicates a strong social recognition memory in VEH/CON and H-DE-71 groups. The mean  
1510 RI value for L-DE-71 was significantly less. **c** When using a different novel mouse on Day 2  
1511 (Novel') as a control, VEH/CON and H-DE-71 F1 mice did not show significantly reduced  
1512 investigation time on Day 2 relative to Day 1, indicating reduction in investigation time is specific  
1513 to familiar juveniles. **d** RI is near 1, indicating no significant change in investigation of Novel' vs

1514 Novel stimulus. \* $P < .05$ , \*\*\*\* $P < .0001$  compared to Day 1 (a, c), compared to VEH/CON (b, d),  
1515  $^{\wedge}P < .05$  compared to L-DE-71.  $^aP < .05$  compared to .65, (a) and 1.0, (b).  $n=5-6$  litters/group. ‘\*’,  
1516 stimulus mouse in insets. D, day

1517

1518 **Fig. 4** Perinatal exposure to L-DE-71 compromises short-term novel object recognition memory  
1519 in F1. **a** Investigation time on novel object recognition test. F1 offspring in the VEH/CON and H-  
1520 DE-71 but not L-DE-71 group show significantly greater time spent investigating the novel (circle,  
1521 N) vs familiar (square, F). **b** L-DE-71 F1 shows a significant negative discrimination index  
1522 indicating less time spent with novel object. **c** Representative dwell-time maps (double gradient,  
1523 blue—minus; red—plus) of time spent exploring novel and familiar objects showed differences in  
1524 dwell times for different exposure groups. **d-f** Representative raster plots indicate no significant  
1525 effect of exposure on general locomotor activity quantified as cumulative distance travelled and  
1526 velocity. **g-l** After a 24 h retention time there was no effect of exposure on investigation time of  
1527 familiar and novel, discrimination index, dwell-time maps, raster plots, distance travelled, or  
1528 velocity. \* $P < .05$ , \*\* $P < .01$ , \*\*\* $P < .001$  compared to familiar object (a) or VEH/CON (b).  
1529  $^{\wedge\wedge\wedge}P < .001$  compared to L-DE-71 (b).  $^aP < .05$ ,  $^{aa}P < .01$ ,  $^{aaa}P < .001$  compared to 0.  $n=4-10$   
1530 subjects/group. F, familiar object; N and N’, novel object.

1531

1532 **Fig. 5** Perinatal exposure to DE-71 does not alter general olfaction function but disrupts  
1533 discrimination of social odors. **a, b** Olfactory preference test on F1 and F0. Both groups showed  
1534 normal olfactory preference for peanut butter odor. **c, d** Sniffing time on Olfactory  
1535 habituation/dishabituation test showed that relative to VEH/CON, L-DE-71 F1 mice showed less  
1536 habituation to social odor 1 and 2. Both L-DE-71 and H-DE-71 showed abnormally reduced



1537 dishabituation to social odor 2. H-DE-71 showed reduced dishabituation to social odor 1, an effect  
1538 that was apparent in L-DE-71. No group differences were noted for F0. \* $P < .05$ , \*\*\*\* $P < .0001$   
1539 compared to water.  $^{\wedge}P < .05$ ,  $^{\wedge\wedge}P < .001$  compared to vanilla;  $^{\S\S}P < .01$ ,  $^{\S\S\S}P < .001$ ,  $^{\S\S\S\S}P < .0001$   
1540 compared to butyric acid.  $^aP < .05$ ,  $^{aaa}P < .001$  compared to VEH/CON during habituation.  $^bP < .05$ ,  
1541  $^{bb}P < .01$ ,  $^{bbb}P < .0001$  compared to VEH/CON during dishabituation. Additional statistical results  
1542 are summarized in Table 2.  $n = 6-15$  litters/group (a),  $n = 11-16$  subjects/group (b),  $n = 12-16$   
1543 subjects/group (c),  $n = 12-16$  subjects/group (d). W, water, B, butyric acid, P, peanut butter, V,  
1544 vanilla

1545  
1546 **Fig. 6** Selective effects of DE-71 exposure on Suok Test. Female offspring and dams were tested  
1547 on SUOK for: **a, b** locomotion; **c-f** sensorimotor coordination; **g** exploratory activity; **h-j** anxiety  
1548 behaviors; and **k** autogrooming. Only H-DE-71 F1 showed decreased mean values in a, b, g, k and  
1549 increased i whereas F0 exposed to L-DE-71 showed increased mean value in i. \* $P < .05$ , \*\* $P < .01$   
1550 compared to corresponding VEH/CON.  $^{\wedge}P < .05$ ,  $^{\wedge\wedge}P < .01$  compared to corresponding L-DE-71.  $n$   
1551 for F1 (litters/group): (a) 10-11; (b) 10; (c) 9-11; (d) 10-11; (e) 11-12; (f) 10-12; (g) 10-12; (h) 10-  
1552 14; (i) 7-8; (j) 9-11; (k) 10-12.  $n$  for F0 (subjects/group): (a) 21-27 ; (b) 17-22; (c) 22-26; (d) 16-  
1553 20; (e) 19-27; (f) 16-20; (g) 22-27; (h) 22-27; (i) 16-26; (j) 22-25; (k) 21-27.

1554  
1555 **Fig. 7** Early-life PBDE exposure does not alter locomotion or anxiety on the open field test. **a, b**  
1556 Distance traveled in open field arena. All F1 exposure groups showed similar reduced exploratory  
1557 activity and velocity over the 1 h. **c, d** Exploration time in periphery and center for all groups  
1558 showed habituation only in the periphery. **e** Exploration time in center was significantly less than  
1559 in periphery for all groups, suggesting no exposure effects on anxiety. **f** Another measure of

1560 anxiety, number of fecal boli, indicated increased emotional reactivity in the L-DE-71 F1 relative  
1561 to VEH/CON. \* $P < .05$ , \*\* $P < .01$ . \*\*\*\* $P < .0001$  compared to center (e) or VEH/CON (f).  $^{\wedge}P < .05$   
1562 compared to corresponding L-DE-71.  $^{\text{a}}P < .0001$  compared to initial time bin for corresponding  
1563 treatment group.  $n = 19-23$  subjects/group. C, center zone; P, periphery zone

1564

1565 **Fig. 8** DE-71 exposure alters gene expression in select brain regions involved in social behavior  
1566 in F1 females. Heatmap representation (double gradient, blue—minus; red—plus) of RT-qPCR  
1567 analysis with the respective fold-change value (mean) of each gene studied by brain region.  $n = 4-$   
1568  $17$ /group. \* $P < .05$  compared to VEH/CON.  $^{\wedge}P < .05$  compared to L-DE-71. BNST, bed nucleus of  
1569 the stria terminalis; AMG, amygdala; LS, lateral septum; SON, supraoptic nucleus; PVN,  
1570 paraventricular nucleus.

1571

1572 **Fig. 9** Perinatal exposure to DE-71 exaggerates plasma ARG<sup>8</sup>-vasopressin but not oxytocin (OXT)  
1573 levels in adult F1 female offspring. **a** Plasma Arg-8 vasopressin measured using EIA using blood  
1574 taken at sacrifice. L-DE-71 exposed offspring showed elevated levels. **b** OXT levels showed no  
1575 changes. \* $P < .05$  compared to VEH/CON.  $n = 8-13$  subjects/group (a);  $n = 6-8$  subjects/group (b).

# Figure 1

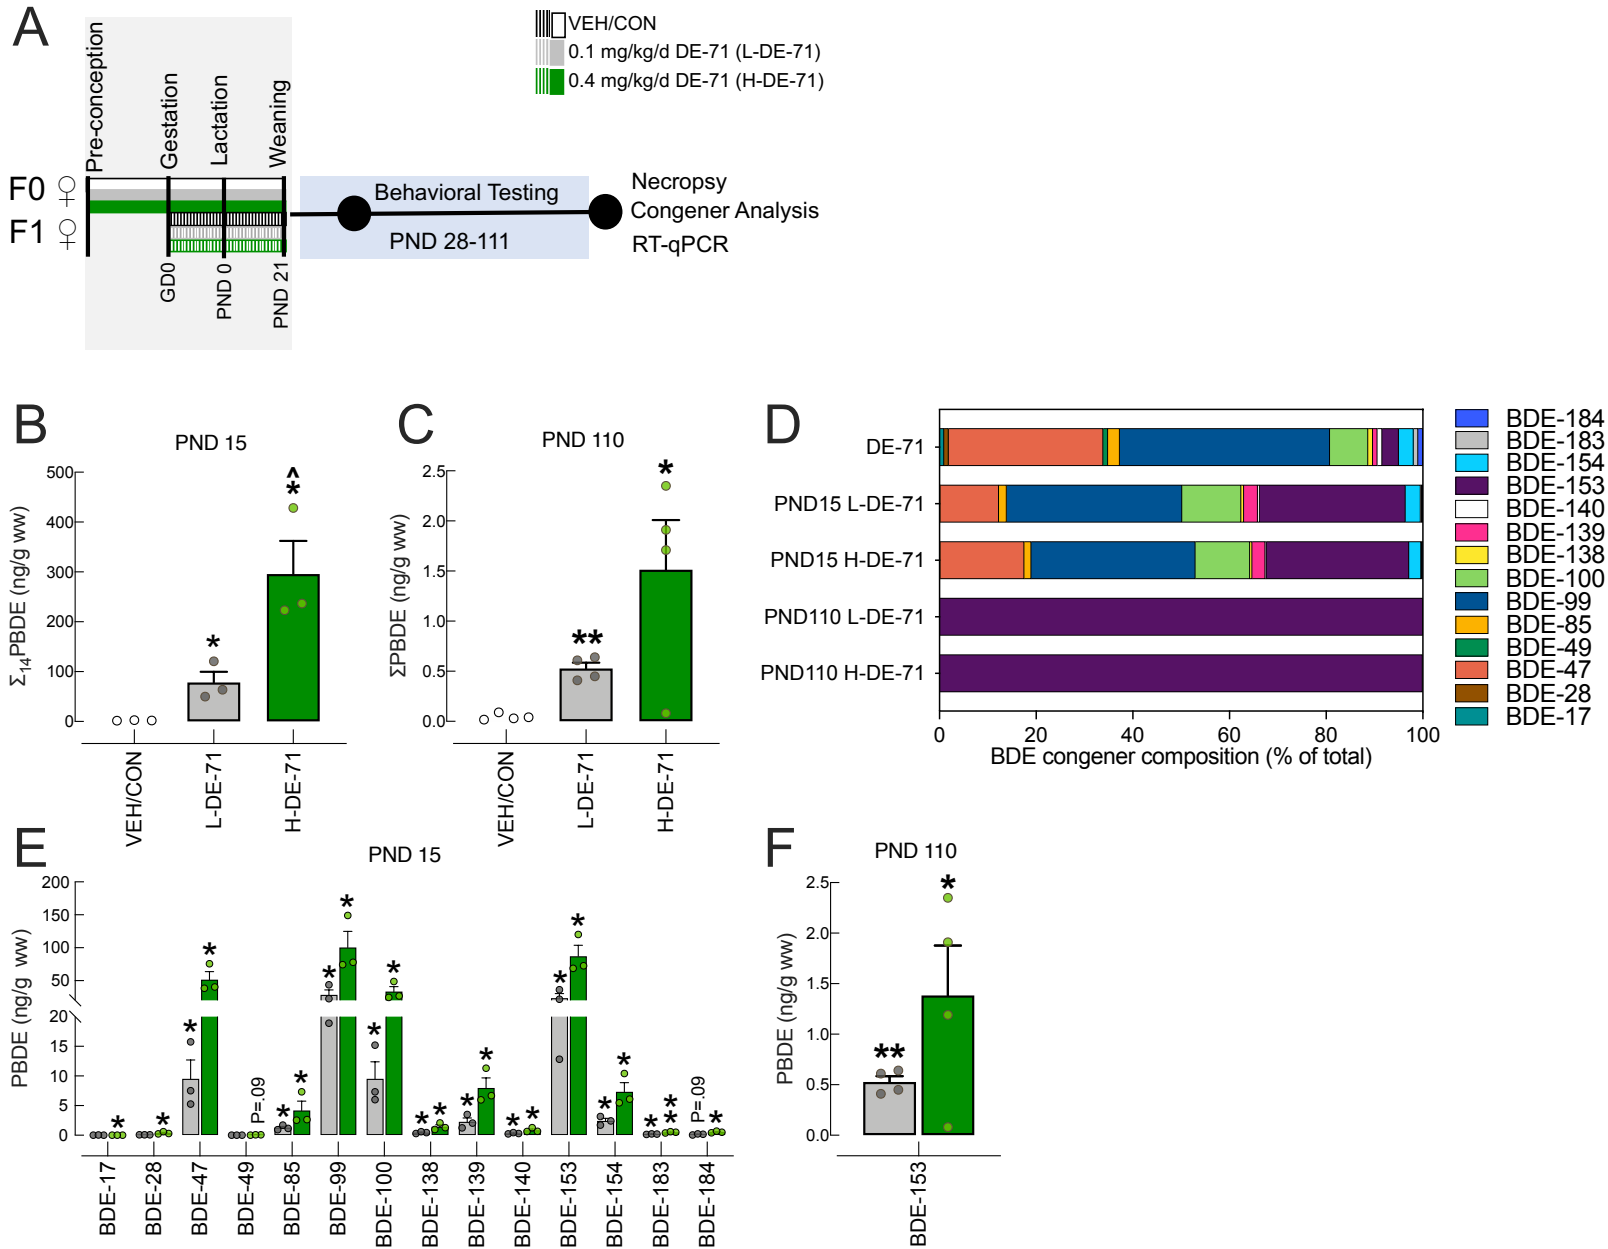

# Figure 2

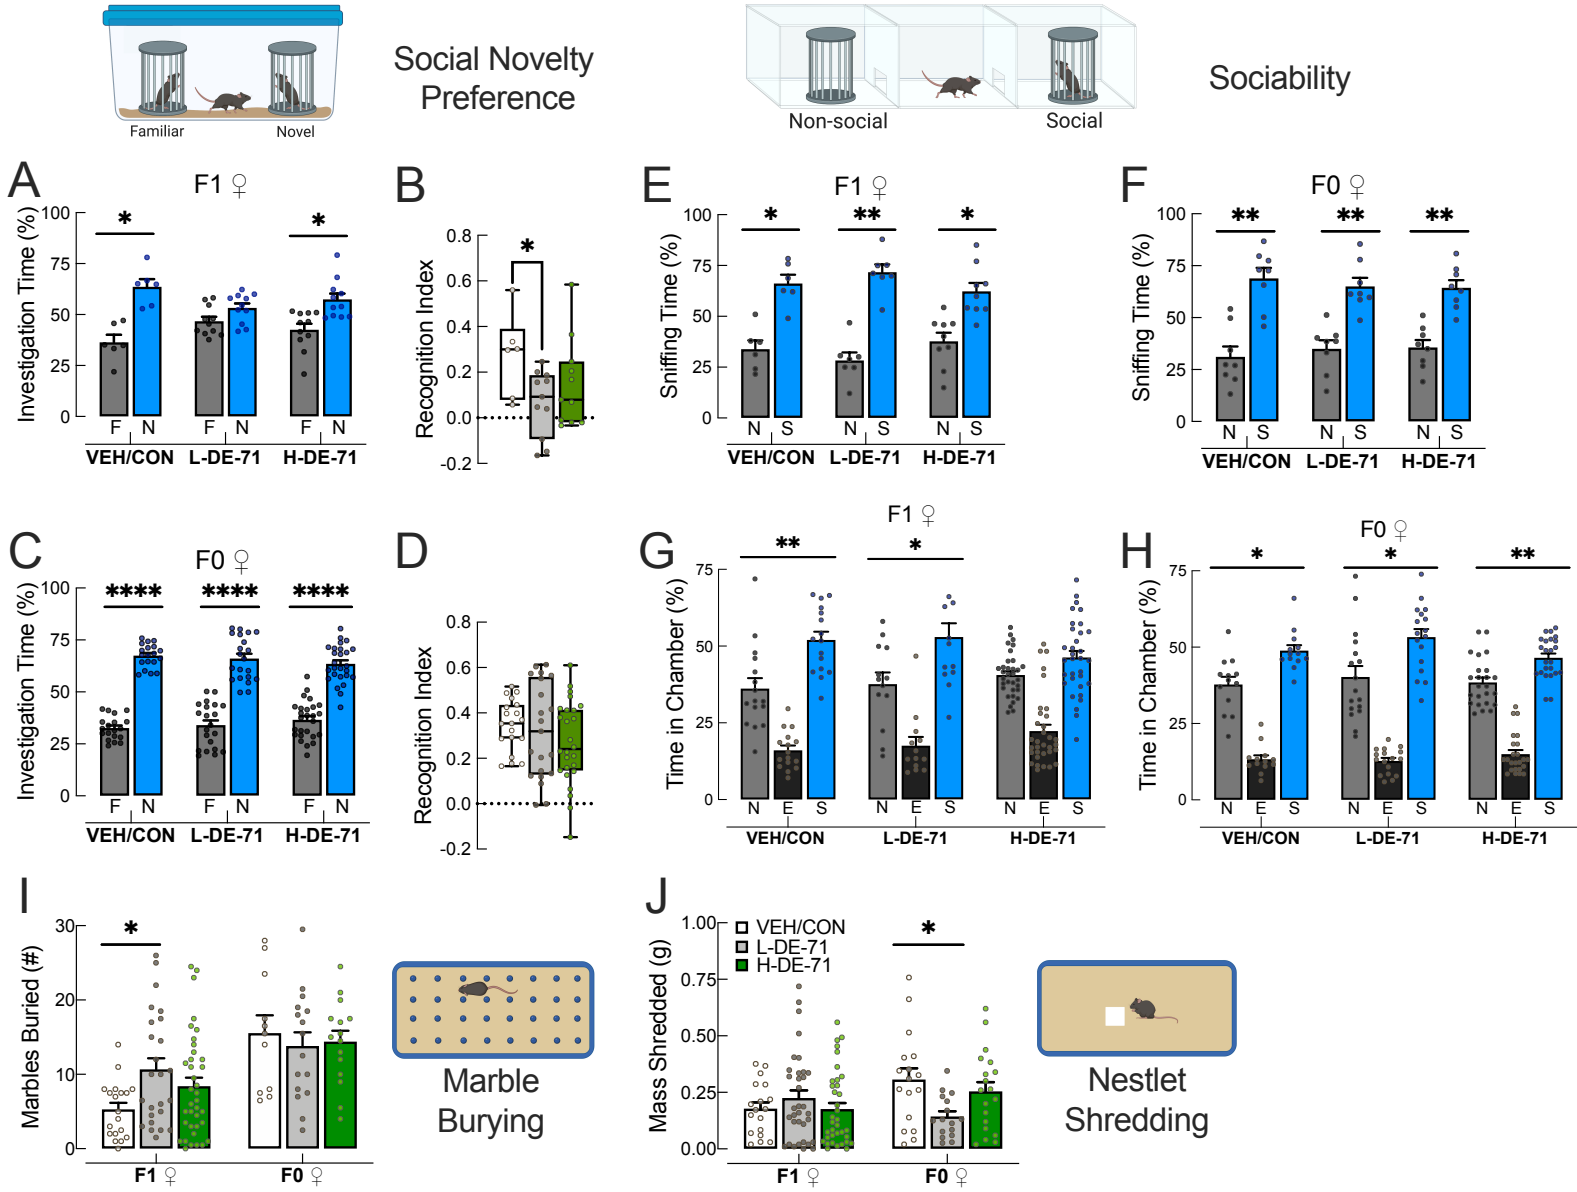

## Figure 3

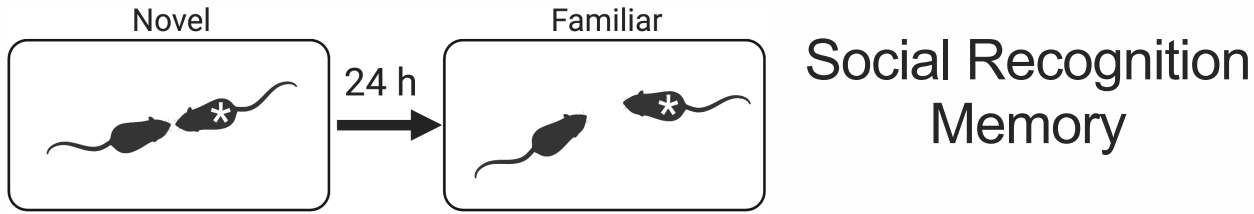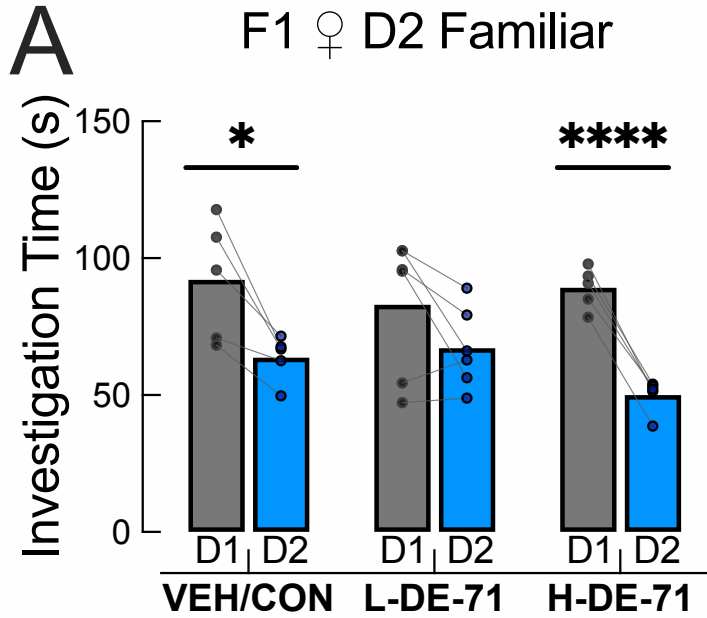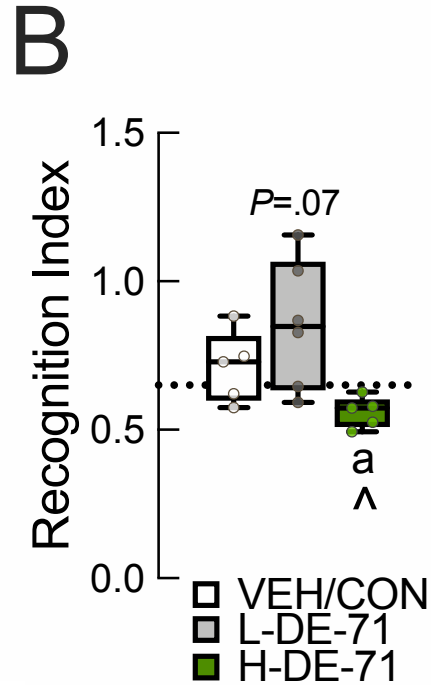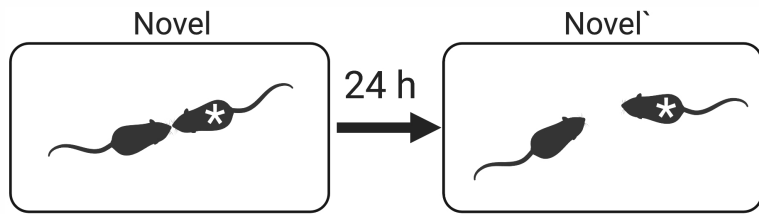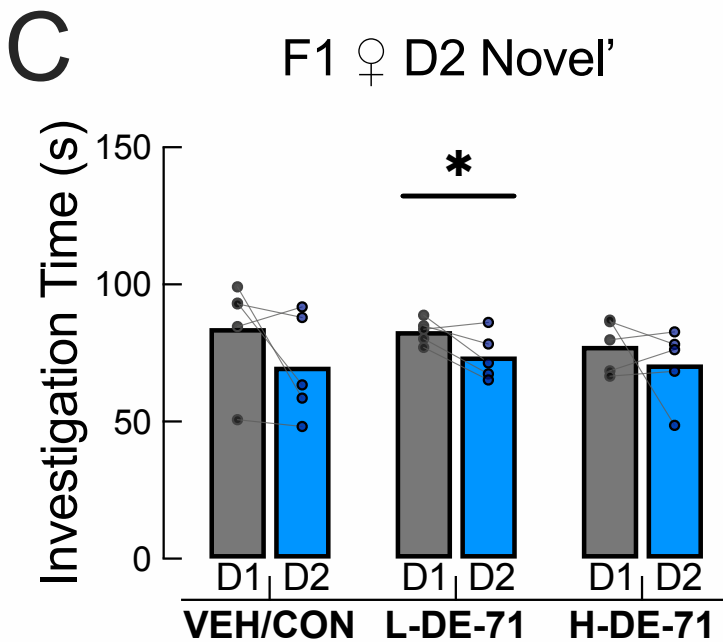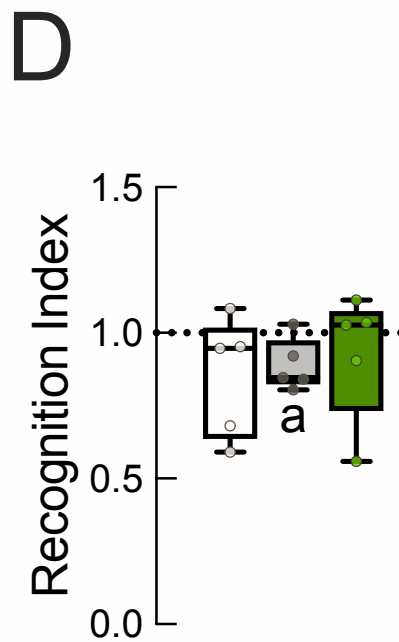

# Figure 4

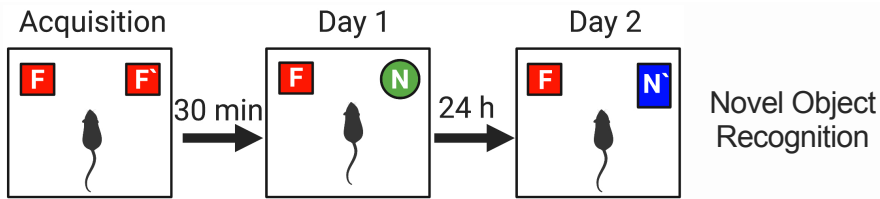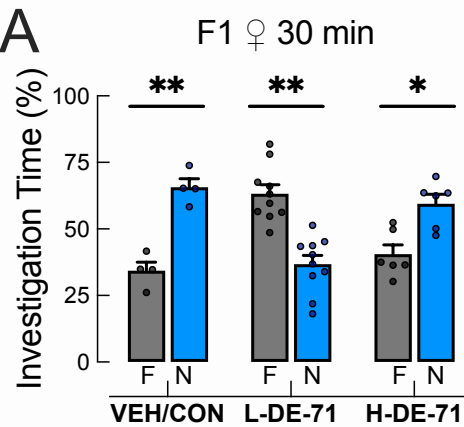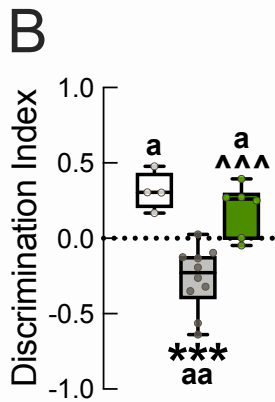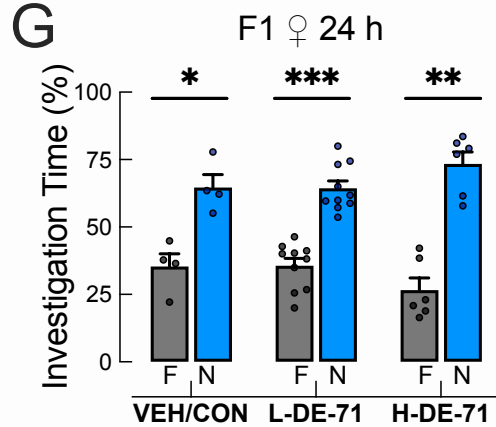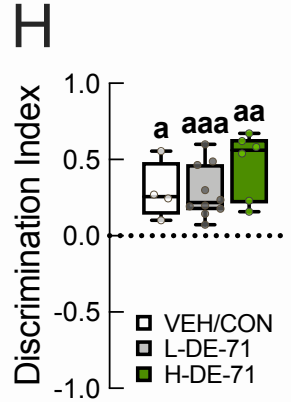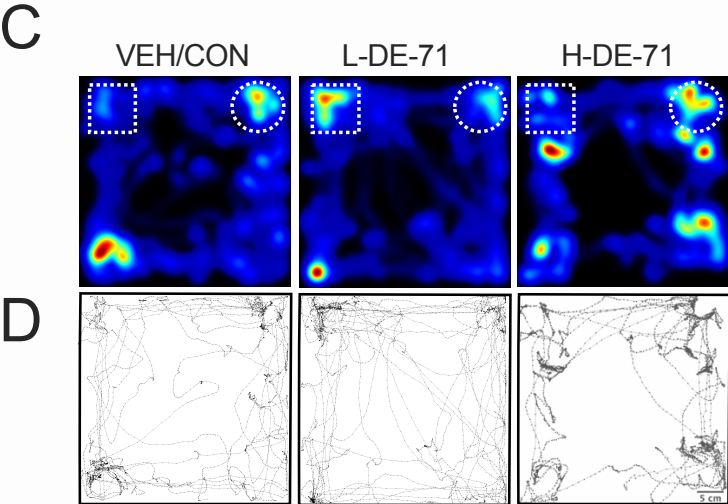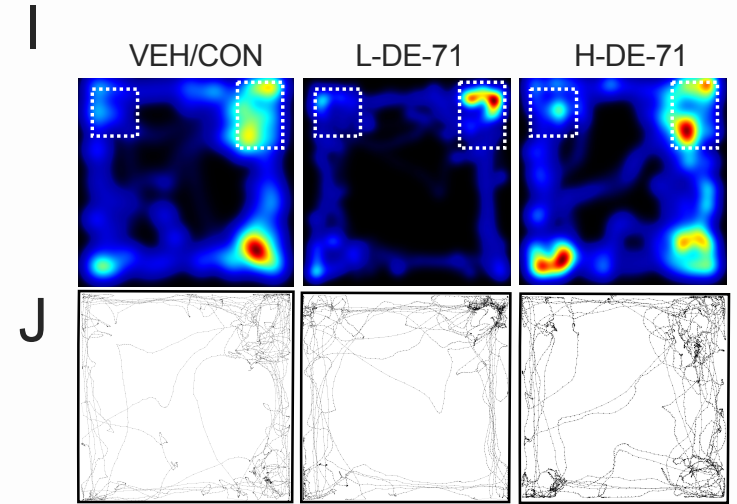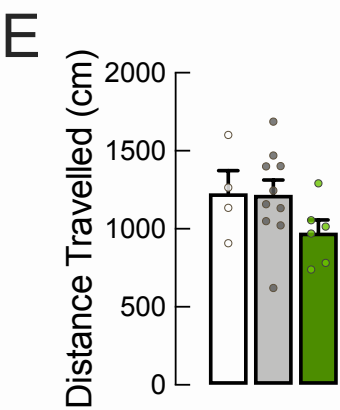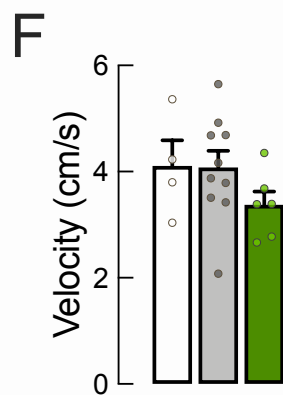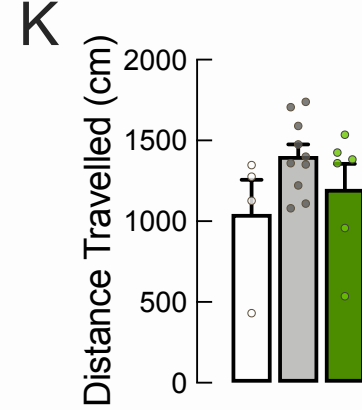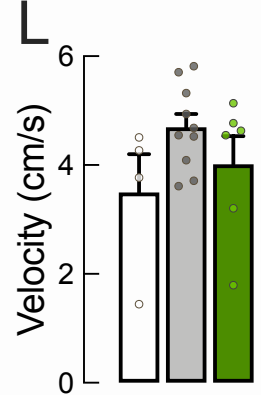

# Figure 5

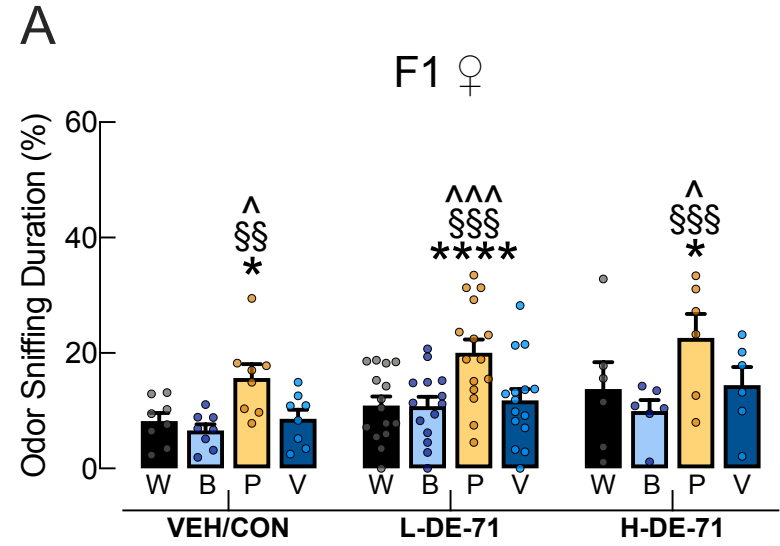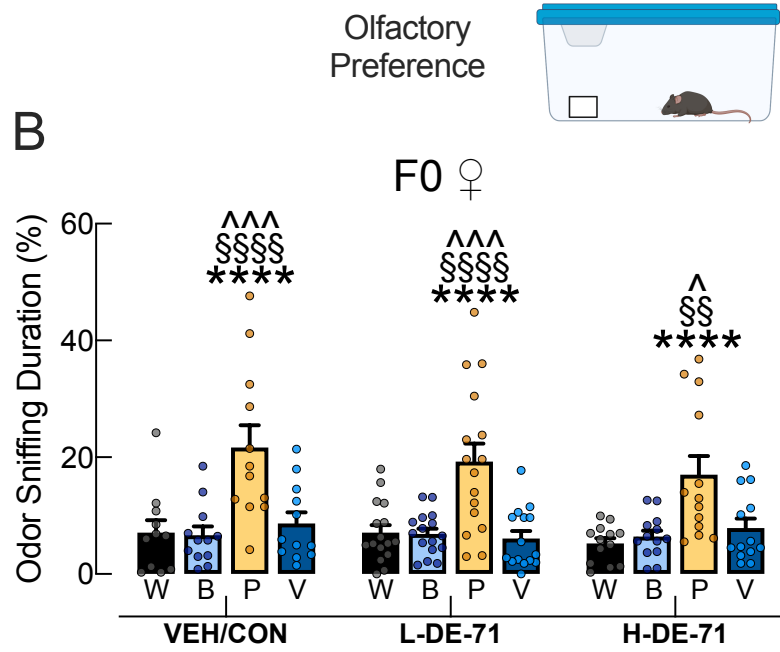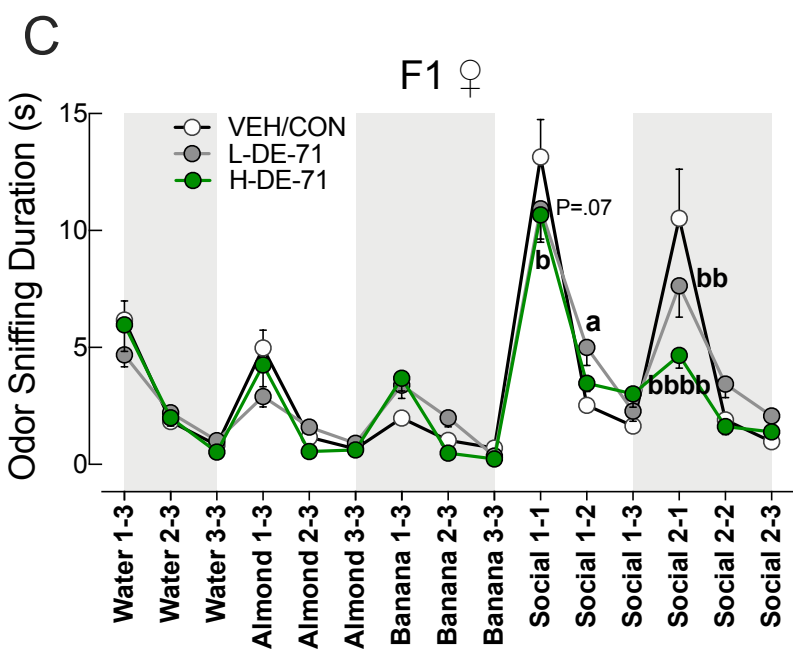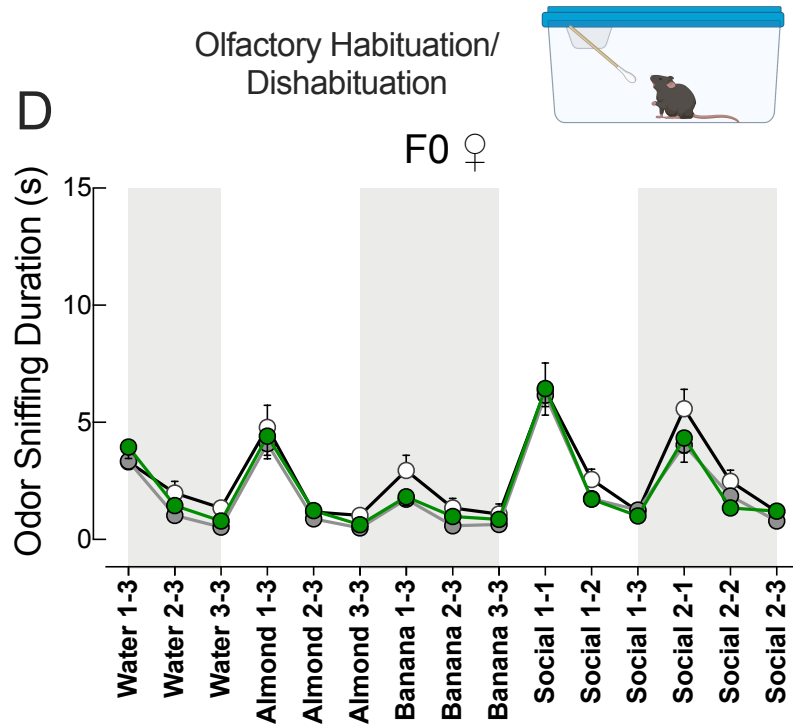

# Figure 6

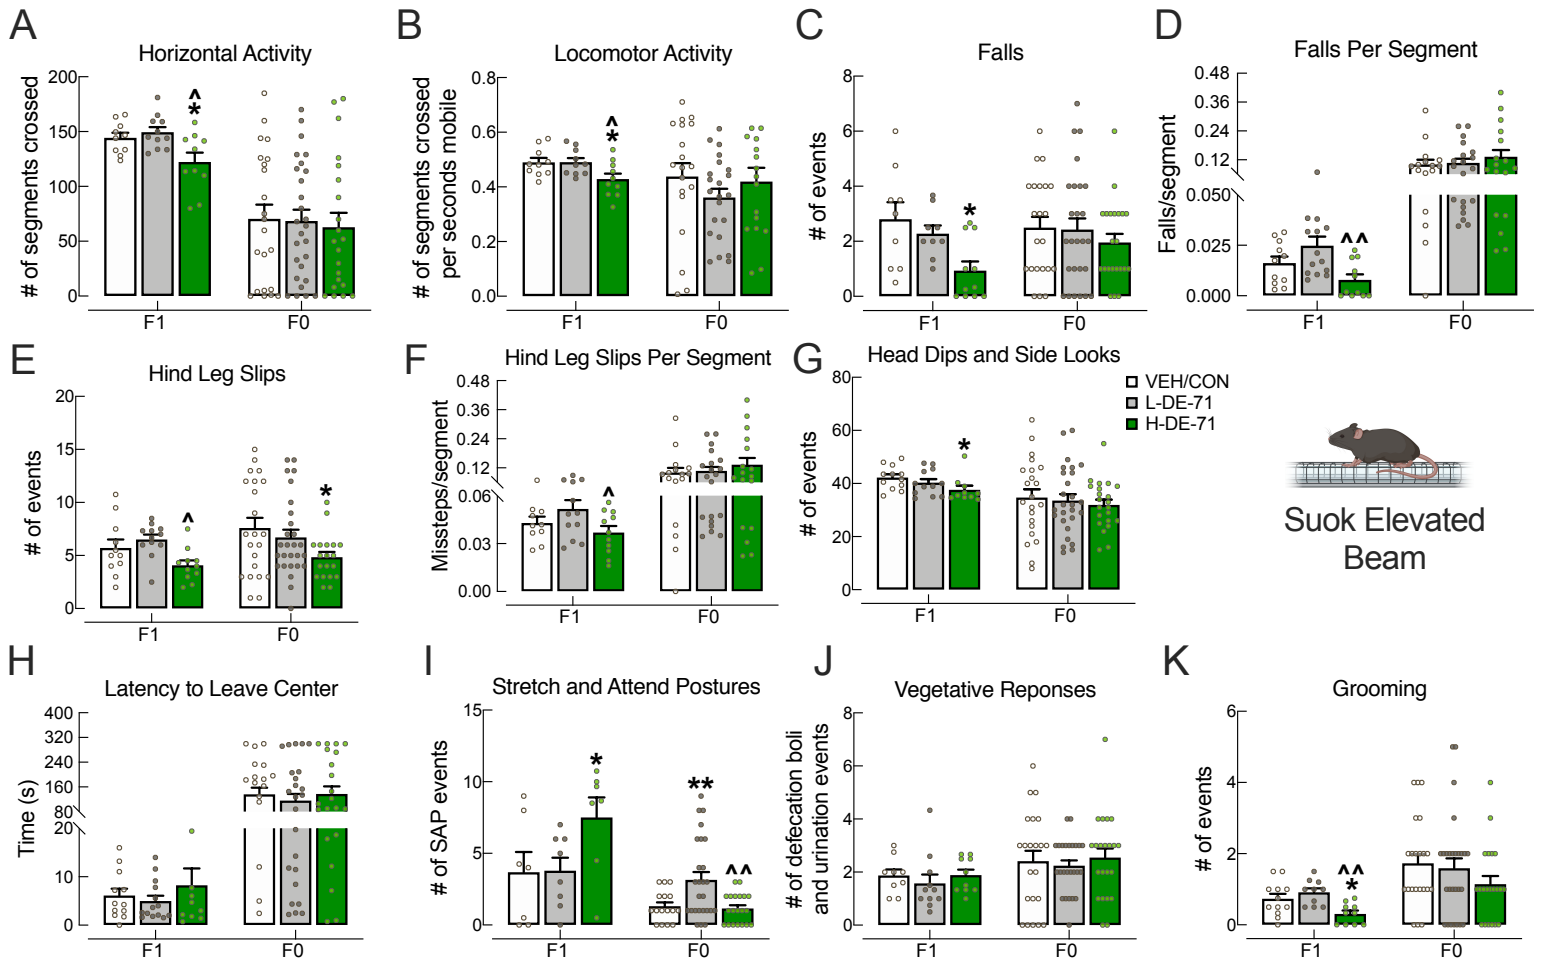



# Figure 7

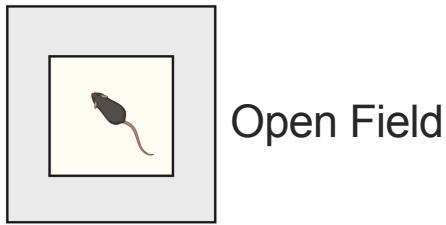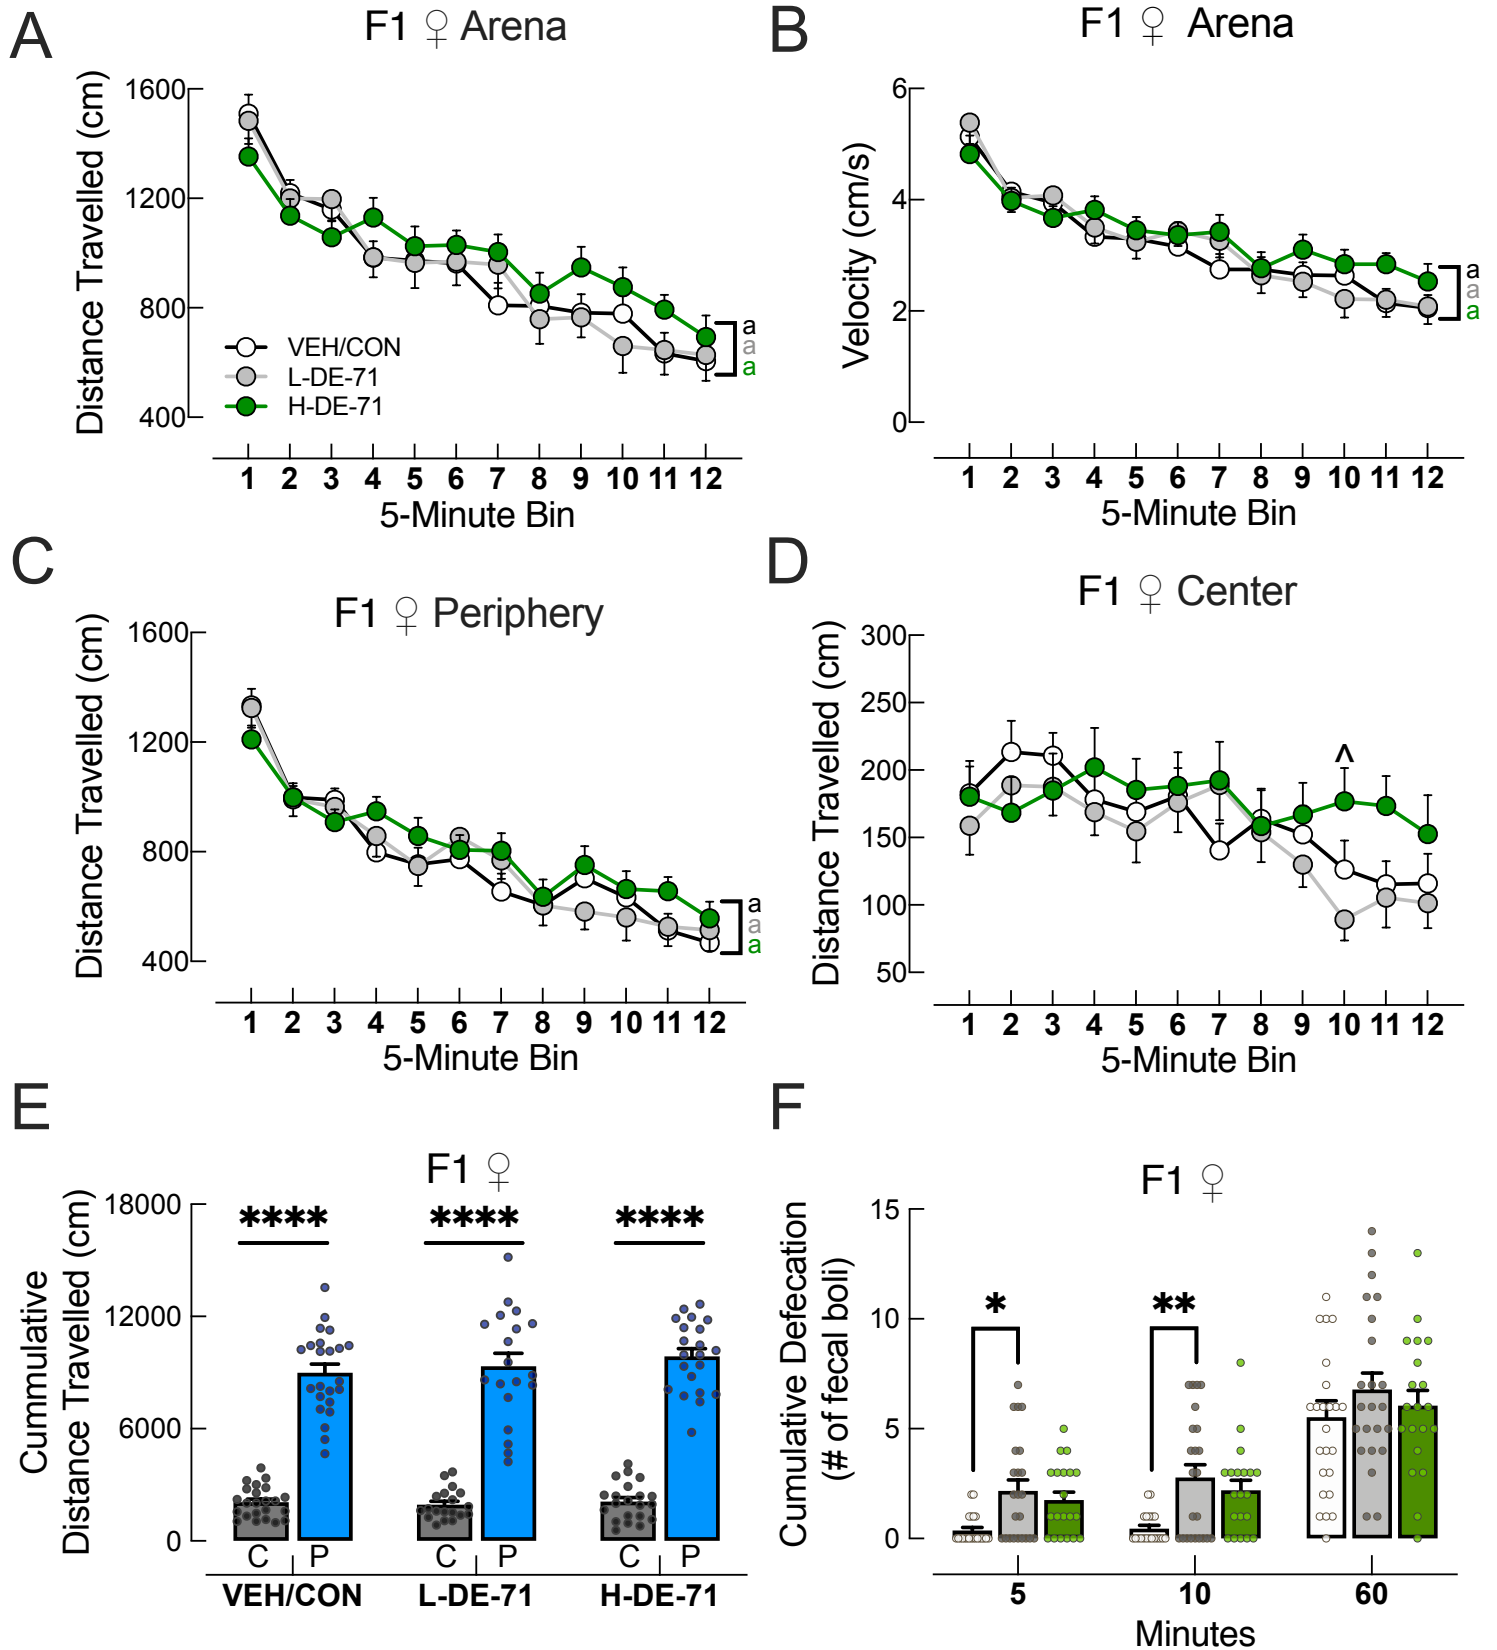

# Figure 8

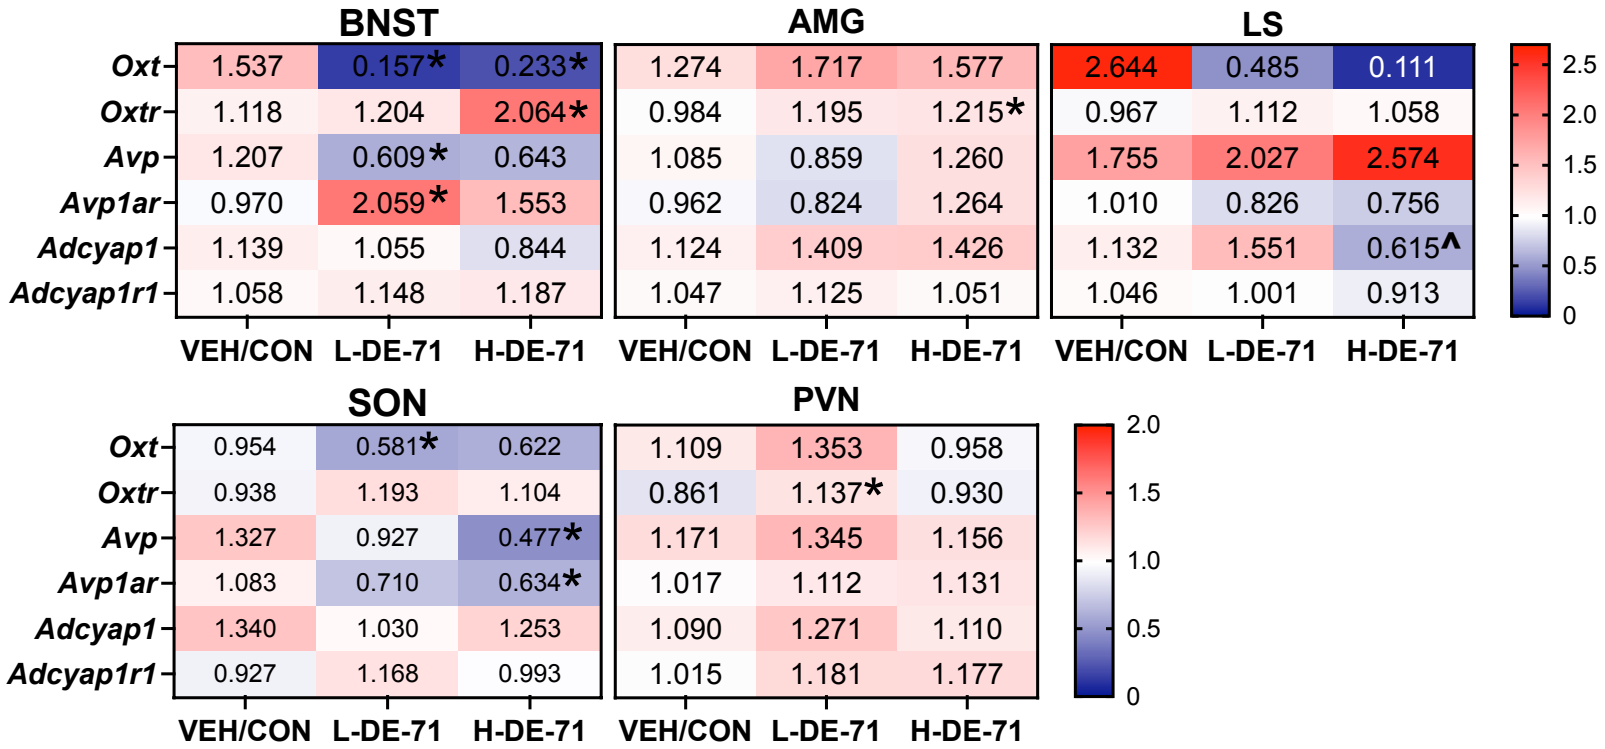

**Figure 9**

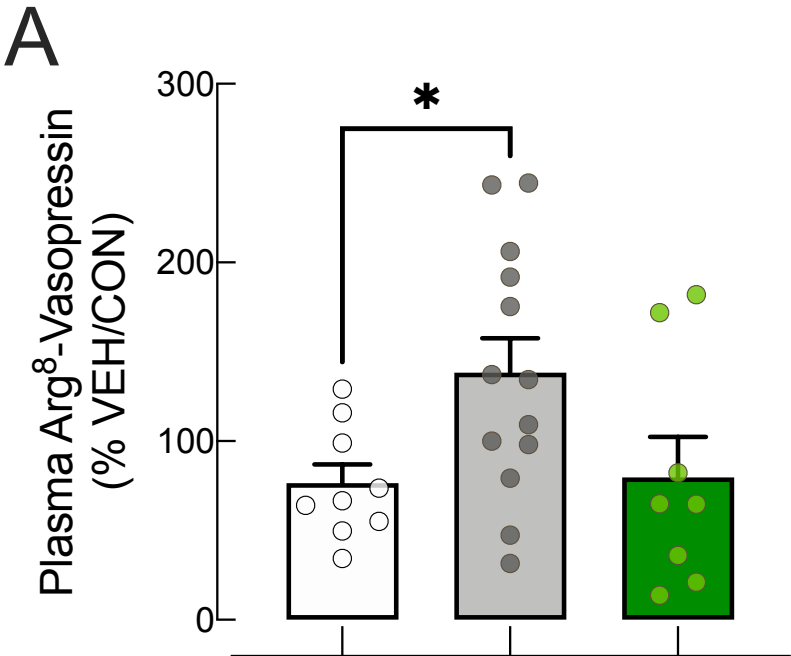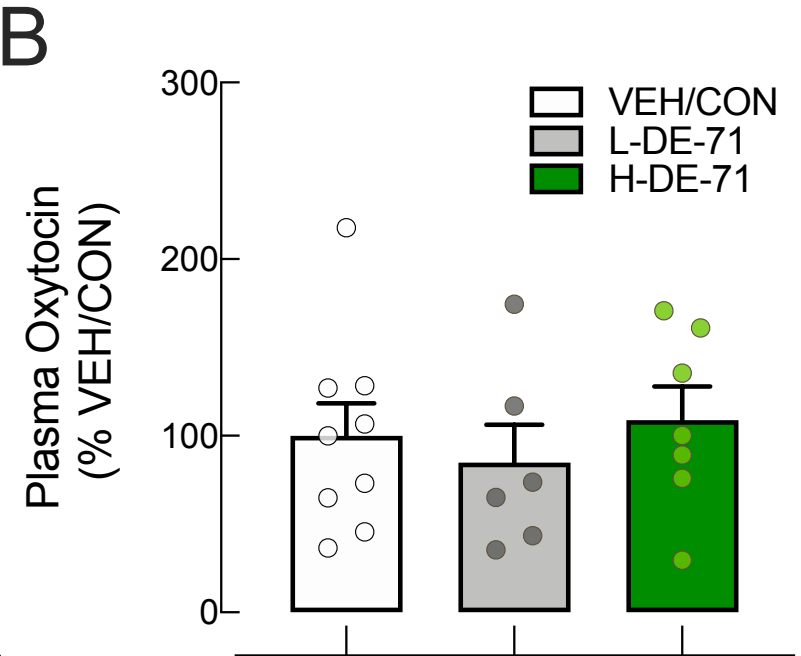

Source: https://www.biorxiv.org/content/10.1101/2021.07.08.451690v1.full.pdf
